# Learning interventions and training methods in health emergencies: A scoping review

Heini Utunen<sup>1\*</sup>, Giselle Balaciano<sup>1</sup>, Elham Arabi<sup>1</sup>, Anna Tokar<sup>1</sup>, Jane Noyes<sup>2</sup>

<sup>1</sup>Health Emergencies Programme, Learning and Capacity Development Unit,  
World Health Organization, Avenue Appia 20, 1202 Genève, Switzerland

<sup>2</sup>Department of Medical and Health Sciences, Bangor University, United  
Kingdom.

\* Corresponding author

E-mail: [utunenh@who.int](mailto:utunenh@who.int)

## 21 **Abstract**

## 22 **Background**

23 Keeping the health workforce and the public informed with the latest evolving  
 24 knowledge is critical to preventing, detecting and responding to infectious  
 25 disease outbreaks or other health emergencies. Having a well informed, ready,  
 26 willing, and skilled workforce and an informed public can help save lives, reduce  
 27 diseases and suffering, and minimize socio-economic loss in affected  
 28 communities and countries. Providing support and opportunities for learning in  
 29 health emergencies is much needed for capacity building. In this paper,  
 30 ‘learning intervention’ refers to the provision of ad-hoc, focused, or personalized  
 31 training sessions with the goal of preparing the health workers for emergencies  
 32 or filling specific knowledge or skill gaps. We refer to ‘training methods’ as  
 33 instructional design strategies used to teach someone the necessary  
 34 knowledge and skills to perform a task.

35

## 36 **Methods**

37 We conducted a scoping review to map and better understand what learning  
 38 interventions and training methods have been used in the different types of  
 39 health emergencies and with whom. Studies were identified by searching  
 40 Pubmed/Medline, Embase and consulting with experts.

41

## 42 **Results**

43 Of the 319 records that were included, contexts related to COVID-19, disasters  
 44 in general, Ebola and wars were most frequently covered. Four topic areas

45 were identified: Knowledge acquisition, Emergency Plans, Impact of the  
46 learning intervention, and training methods. Much of the evidence was based  
47 on observational methods with few trials, which likely reflects the unique context  
48 of each health emergency. Evolution of methods was apparent, particularly in  
49 virtual learning. Learning during health emergencies appeared to improve  
50 knowledge, management, quality of life, satisfaction and clinical outcomes.

51

## 52 **Conclusion**

53 This is the first scoping review to map the evidence, which serves as a first step  
54 to develop urgently needed global guidance to further improve the quality and  
55 reach of learning interventions and training methods in this context.

56

## 57 **Introduction**

58 Learning in health emergencies can provide a foundation to build capacity for  
59 emergency preparedness and response specific to different health  
60 emergencies(1) (e.g., biological, environmental, armed conflicts, deliberate acts  
61 of terrorism, industrial accidents), especially in low and middle income countries  
62 where health systems need to be further strengthened(2). A ready, willing, and  
63 able workforce is required that can be called upon in health emergencies to  
64 help save lives, reduce diseases and suffering, and minimize socio-economic  
65 loss in affected communities and countries. In today's interconnected  
66 landscape, an educated public is also needed to champion measures for a  
67 strong emergency preparedness and effective response(1). This can be  
68 achieved by guiding, standardizing and facilitating the delivery of life-saving  
69 knowledge, first to frontline workers in health emergencies and second to the

70 public. Learning paves the way for strengthened health literacy and  
71 understanding of health communication which, in turn, bolsters awareness and  
72 support for measures needed during health emergency events(3).

73

74 The World Health Organization (WHO) is developing guidance on *Learning in*  
75 *Emergencies* to provide evidence-based interventions, training methods and  
76 tools for professionals, communities and institutions to ensure quality learning  
77 provision and knowledge dissemination during health emergencies. The primary  
78 reason to develop the guidance was due to lessons learned from the COVID-19  
79 pandemic The COVID-19 pandemic presented unique circumstances and  
80 global challenges when it became clear that ‘just in time’ learning was required  
81 to retrain and upskill large numbers of health professionals in order to launch  
82 an effective response. For example, new methods and approaches for testing  
83 and surveillance at scale were proven essential to operate at the national,  
84 regional, and local level, which involved the need for rapid dissemination and  
85 uptake of new learning so that the entire health, social care and education  
86 workforce were equipped with relevant knowledge and skills to respond  
87 effectively, especially in low and middle income countries(4, 5).

88

89 The COVID-19 pandemic also prompted the need to integrate effective risk  
90 communication strategies to tackle the evolving information needs and  
91 misinformation or infodemic (i.e., short for information epidemic) (6) and  
92 potential spread of misinformation that could negatively impact on efforts to  
93 develop and deliver learning interventions to professionals, communities and  
94 institutions(7). From the onset of the COVID-19 pandemic, WHO committed to

95 knowledge dissemination to frontline health workers, governmental and non-  
 96 governmental actors, policy makers, capacity builders and trainers as well as  
 97 the public via its low-bandwidth adjusted online platform. In addition to regular  
 98 updates as more research emerged, WHO intended to regularly assess the  
 99 effectiveness of this initiative - that is knowledge dissemination through its  
 100 online platform (OpenWHO) on all the aspects of tackling the pandemic and  
 101 then including other health emergencies. Key findings indicated that employing  
 102 strategies to make learning more equitable and accessible can yield better  
 103 results in terms of outreach, and that learning production must be targeted for  
 104 real-time events in languages spoken in outbreak impacted areas(8).  
 105 Nonetheless, learning design based on inclusive pedagogy and learning  
 106 sciences, while being cognizant of barriers, such as poor internet connection or  
 107 limited digital literacy, to access learning can optimize learning experience(9).

108

109 The second rationale for developing the Learning in Emergencies guidance is  
 110 that various current guidelines tackled adult learning partially or in one  
 111 dimension. WHO itself has published several frameworks and  
 112 recommendations. However, none of these related guidelines covers Adult  
 113 Learning in Health Emergencies. The Learning in Emergencies guidance will  
 114 address a priority issue cited during the World Health Assembly (WHA), to help  
 115 WHO support governments in their health-related capacity building and to reach  
 116 health learning goals. The *Learning in Emergencies* guidance will encompass  
 117 the full scope of learning as preparedness, readiness, response and resilience  
 118 actions in capacitation for public health emergencies.

119 This scoping review of literature was undertaken to inform further  
120 methodological choices and the commissioning of subsequent systematic  
121 reviews to feed into the Guidance development process.

## 122 **Objectives**

123 The objective of this scoping review was to map the existing evidence (including  
124 qualitative, quantitative and mixed-methods peer-reviewed publications, grey  
125 literature studies, systematic and other types of literature reviews and  
126 qualitative evidence synthesis) that has been published on the topic.

## 127 **Target population**

128 The target population included experts and individuals in need of health  
129 information, such as health workforce, experts and volunteers, national  
130 institutions and ministries (governmental and non-governmental actors),  
131 policymakers, academia, capacity builders and trainers, citizens and affected  
132 populations.

## 133 **Phenomenon of interest**

134 The phenomena of interest were classified as learning interventions as  
135 specified below and health emergencies including the follow types: Biological,  
136 Environmental, Armed conflicts, Deliberate acts of terrorism and Industrial  
137 accidents.

## 138 **Intervention/Exposure**

139 Learning interventions included:

- 140 • Continuous learning for professionals preparing for or acting in health
- 141 emergencies
- 142 • Adult learning interventions and methods in emergency situations
- 143 • Professional education, training and learning
- 144 • Real time, just in time learning
- 145 • Knowledge and learning transfer from an expert organization
- 146 • Learning readiness in anticipation and preparedness for any health
- 147 hazard

## 148 **Methods**

149 The methodology was guided by Arksey and O'Malley's (8) five stage  
 150 framework for scoping reviews: identifying the research question(s), identifying  
 151 relevant studies, charting the data, collating, summarizing, and reporting the  
 152 results. In addition, principles of mixed-methods framework synthesis were used  
 153 to manage diverse study designs and help extract, map, chart, categorize and  
 154 summarize study findings(10). The review was reported using the relevant  
 155 domains of the Preferred Reporting items for Systematic Review and Meta-  
 156 Analysis for scoping reviews (PRISMA-ScR)(11).

157 A priori protocol was developed and published on the Open Science  
 158 Framework: <https://doi.org/10.17605/OSF.IO/5BK9R>.

## 159 **Selecting relevant studies**

160 Searches were carried out between February 2nd and February 28th 2023, and  
161 covered sources from 2003 to the present. Key search terms were identified  
162 within three PICO question components (Table 1 Supplementary material).  
163 These terms were also used to identify relevant documents from which Medical  
164 Subject Heading (MeSH) or other database-specific terms and keywords could  
165 be extracted.

166 Key terms were searched using a free text strategy in the titles and abstracts.  
167 This allowed having a broader, more sensitive approach and eliminated the  
168 possibility of relevant items being missed. MeSH was applied to give more  
169 specific results.

170 The following databases were searched: Pubmed/Medline and Embase, using  
171 predefined combinations of key search terms. To prioritize LMICs, filters of the  
172 selected databases were applied. The search strategy and search words are  
173 annexed (Table 2 Supplementary material).

174 Search results were scanned for relevance and those meriting further  
175 examination were imported into Rayyan for further consideration. The search  
176 and initial screening were undertaken by GB and studies checked by other  
177 authors were included. Citations were excluded if they focused exclusively on  
178 academic settings (early education through medical school), did not have a  
179 learning intervention (for example studies addressing knowledge in unprepared  
180 professionals) or were not contextualized during or for a health emergency.  
181 News (or announcements) as well as protocols of studies/reviews that had not  
182 been completed, and other irrelevant document types were excluded, as well as  
183 non-peer reviewed articles.



184 Titles and abstracts were screened against the following inclusion criteria: (1)  
 185 published between 2003 and 2023; (2) abstract and title written in English; and  
 186 (3) presenting data on research question (date, methodology, with focus on  
 187 geographical low and middle income context, type of learning/intervention and  
 188 for whom, type of emergency), (4) peer-reviewed sources only. Then, screening  
 189 of full texts of pre-selected citations against above-mentioned criteria was  
 190 performed. At this stage full texts written in other UN-languages and Portuguese  
 191 language were included as well. Processes were undertaken by GB and  
 192 crossed checked by co-authors. We did not undertake double blind processing.

## 193 **Charting the data**

194 All the included evidence was extracted into an Excel spreadsheet and included  
 195 citations were exported into Endnote. Data were extracted systematically using  
 196 a standardized form that included information on the period of study, location,  
 197 study population, design, research questions, key findings, and conclusions.

198 At the mapping stage we did not focus on the findings and conclusions as not  
 199 all studies were selected for inclusion in the systematic reviews that will  
 200 subsequently be commissioned.

## 201 **Collating, summarizing and reporting results**

202 The charted data (in the form of an evidence map) were then further analyzed,  
 203 grouped and sorted guided by the review aim and objectives. We specifically  
 204 focused on developing an understanding of the available literature on the  
 205 phenomena of interest and created visual displays and tables. We also  
 206 identified and described four major topic areas.

207

## 208 **Results**

209 A total of 6411 articles were imported into Rayyan, of which 1656 were  
 210 duplicates and 4317 were excluded based on a brief scan of titles and  
 211 abstracts. The remaining 446 documents were sorted by full-text access. One  
 212 hundred and thirteen articles were excluded for not being relevant and fourteen  
 213 did not have full text access. As shown in Fig 1, 319 articles met the inclusion  
 214 criteria and were included. Full description of included studies can be found in  
 215 Table 3 of the Supplementary material.

### 216 **Fig 1: PRISMA Flowchart**

217

## 218 **Overview of study characteristics**

219 Most of the articles were descriptive studies on experiences in different  
 220 countries(12-176), followed by before-after studies(169, 173, 177-260). Also,  
 221 we found 19 randomized controlled trials(261-279), 14 cross-sectional  
 222 studies(280-293), 12 observational studies(294-305), 7 reviews(306-312), 5  
 223 qualitative studies(313-317) and 3 opinion pieces(318-320). (Table 4  
 224 Supplementary material)

225

## 226 **Emergency context**

227 COVID-19, Disasters in general, Ebola and wars were the most frequent topics.  
 228 This is related to the publication dates because most studies have been

published during these health emergencies (Ebola, 2015 and COVID-19 during 2020, 2021 and 2022) (Fig 2)

## Fig 2: Type of emergency distribution

## Location

Most studies were conducted in China (mainly due to COVID-19 and Earthquakes), India and South Africa. A large number of the learning evidence was also derived from several countries in Africa.

## Interventions, learning methods and tools

Different types of learning interventions are described across the studies. The majority of the studies used in-person training as an intervention(12, 14, 18-22, 30, 33, 34, 37-42, 46, 48-50, 52, 55, 61, 66, 67, 70, 72, 73, 75-78, 80-82, 87, 93, 97-100, 104, 108, 109, 111, 118, 120, 122-126, 128-131, 133, 135, 136, 138-141, 143, 144, 146-151, 153-159, 161, 165, 172, 174, 178-182, 184, 185, 187-189, 193, 195, 197, 198, 200, 206, 210, 212, 214-217, 220, 222, 223, 225, 228, 229, 232, 234, 237, 238, 243-245, 247-254, 257, 259, 261, 262, 264, 266, 268, 269, 271, 273, 275, 277, 279, 282, 288-290, 292, 294, 295, 298, 302, 313, 315, 317, 318, 320, 321), followed by virtual training.

Lectures, discussions, role playing, 'hands on' basic skills training, materials, videos and simulations were used as in-person modalities. Additionally, 9 studies(26, 83, 85, 89, 117, 224, 263, 297, 307) suggested a professional approach (such as Masters degrees and post graduate studies in universities) as a way of preparing healthcare workers for health emergencies.

253 Within the virtual modalities, studies describe the use of Telemedicine(91, 92,  
254 94, 96, 192, 283, 289), Massive Online Open Courses (MOOC)(28, 166, 208,  
255 280, 296), Social Media(15, 265, 281, 284), Gamification(183, 274), Virtual  
256 simulation(88, 272), Artificial Intelligence(86, 300) and Mobile devices(147,  
257 202).

258 A few studies used blended format, usually workshops followed by virtual  
259 training (in-person and virtual)(35, 44, 54, 63, 64, 101, 126, 127, 152, 191, 241,  
260 270, 301, 318-320) (Fig 3)

### 261 **Fig 3: Type of learning method distribution**

262

## 263 **Learners**

264 Most of the learning interventions were directed at the health workforce such as  
265 medical doctors, nurses, dentists, medical students, laboratory staff and  
266 paramedical students. Some learning interventions were also aimed at military  
267 personnel, citizens and affected population, volunteers, academia and national  
268 institutions. (Table 5 Supplementary material)

269

## 270 **Learning content**

271 Curricula content was mostly focused on disease and disaster management.  
272 Some content was about personal safety and security(48, 49, 54, 203-205, 207,  
273 208), waste management(65, 211, 298), mental health(94, 104, 165, 171, 176,  
274 212, 220, 234, 258, 276, 292), infection control and prevention(138, 167, 240,  
275 263, 301), pest control(64, 65, 69, 211, 215, 298), triage(15, 61, 90, 93, 206,  
276 270, 289) and stress management(30, 181, 269). A smaller number of curricula  
277 included surgical training(97, 98, 164, 322), time management(222),

278 stigma(268), language and local culture(19), humanitarian law and  
279 leadership(101), chemical incidents(213) and dealing with ethical dilemmas(71).  
280

## 281 **Major topic areas**

282 By grouping the studies, four major topics were identified:

- 283 1) Knowledge acquisition: Articles that analyzed how much knowledge was  
284 acquired during learning interventions as a way to assess effectiveness  
285 of the intervention methods.
- 286 2) Emergency Plans: Learning recommendations focusing on how  
287 governments and institutions should be prepared to face health  
288 emergencies.
- 289 3) Impact of the learning intervention: Articles that analyzed how learning  
290 and training during health emergencies had an impact on trainees and  
291 affected populations.
- 292 4) Training method: Articles that focus on different learning methods and  
293 tools that can be used for knowledge transfer during a health emergency.  
294

295 The distribution of the major topics across the evidence is shown in Fig 4.

296 The largest number of articles found (n = 101) correspond to “Knowledge  
297 evaluation”, followed by articles corresponding to “Emergency Plans” (n=84)  
298 and “Training Method” (n=68). Finally, “Impact” was analyzed in 66 studies.

## 299 **Fig 4: Major topics distribution**

300

## 301 **Knowledge acquisition**

For knowledge evaluation, 101 studies(17, 18, 33, 41, 42, 48, 65, 79, 90, 94, 95, 97, 99, 100, 103, 107, 109, 111, 116, 155, 163, 168, 169, 172, 175, 177-180, 182, 185-187, 189, 194-198, 200, 202, 205-207, 211, 212, 214, 216, 217, 219, 221, 223-228, 230-235, 237, 239, 243-245, 248, 249, 252, 253, 256, 258, 259, 264-266, 268, 270, 272, 273, 278, 279, 283, 284, 286, 288-290, 292, 294, 298, 300-302, 304, 305, 315, 317) provided information about how a learning intervention during a health emergency can impact the knowledge of trainees. According to the results of these studies, learning interventions were helpful for improving knowledge, preparedness and confidence of trainees. On the other hand, improved knowledge had a positive impact on diagnosis, and health outcomes such as rate of infected patients.

313

## 314 **Emergency Plans**

84 studies(25, 35, 37-39, 43, 49-51, 53, 54, 56, 59, 60, 62, 63, 66, 68, 70, 72-74, 77, 80-82, 85, 102, 106, 112, 113, 117, 118, 120, 121, 125-128, 130-134, 136, 141, 146, 148, 149, 151, 154, 156-158, 161, 162, 164, 165, 171, 173, 174, 176, 183, 190, 238, 247, 255, 262, 267, 274, 285, 287, 306-311, 316, 318, 319, 323-325) described the use of learning interventions as part of their emergency plans from countries and health institutions: 65 are reports, 6 are reviews and the rest of the evidence are randomized control trials, before and after studies, opinions, cross-sectional and qualitative studies. The evidence described how countries and hospitals should train healthcare workers, military, citizens and students in environmental emergencies (earthquake, tsunami, typhoons and disasters in general), biological emergencies (COVID-19, HIV, syphilis, Ebola, Cholera and Zika) and armed conflicts (war and chemical emergencies). The

objective of this training was to prepare different populations for a future emergency and this explains why these interventions were not offered during an emergency.

As for the RCT, Ma et al(274) compared the use of a gaming technique versus a disaster simulation and Lee et al(267) compared two video techniques: basic response to a fire versus generic volcanic emergency. In both studies, knowledge competence and response were statistically higher in the intervention groups (gaming technique and video response to fire emergencies).

## **Training Methods**

On training methods, 68 studies(12-16, 19-24, 26-29, 31, 32, 36, 40, 44, 46, 47, 52, 57, 58, 61, 64, 67, 78, 83, 84, 86, 87, 89, 92, 96, 110, 122-124, 137, 140, 144, 145, 147, 152, 160, 166, 167, 169, 192, 203, 213, 215, 246, 250, 254, 260, 293, 296, 297, 299, 303, 312, 320, 321, 326) focused on describing different training methods that can be used during a health emergency. 15 studies described in-person training methods, and the rest of them used a virtual training method such as simulation, telemedicine, MOOC, videos or artificial intelligence.

MOOCs were used for cholera(28) and COVID-19(166, 296, 314), and all of these studies showed that this method can be useful to disseminate trustworthy information in low and middle-income countries and fill the gap of information during health emergencies.

Artificial intelligence(86) was used during COVID-19 to help radiologists to efficiently and timely diagnose the COVID-19 suspected patients.

352 Videos(203) were implemented in Burkina Faso during a dengue epidemic. This  
353 study concluded that videos are effective for knowledge transfer and training  
354 health professionals, however the narrative genre of the videos can influence  
355 knowledge acquisition.

356

## 357 **Impact of learning interventions**

358 Two studies measured impact as satisfaction in citizens and affected  
359 populations: One of them (261) trained parents of high-risk children about  
360 malaria prevention using an in-person technique. Participant satisfaction was  
361 assessed using a qualitative approach, however the main challenge reported  
362 was adherence to the course. The other study(184) reported on in-person  
363 training of Syrian refugee mothers of children with autism about overcoming  
364 trauma by war. Satisfaction was analyzed and improvements were  
365 recommended by the attendees, such as using online methods during the  
366 course.

367 In the rest of the evidence that reported satisfaction as an outcome, it was  
368 measured as self-perceived, as mental health status of healthcare workers,  
369 well-being and preparedness.

370 27 studies analyzed how training during a health emergency impacted on the  
371 quality of life of healthcare workers, citizens and volunteers. The endpoints  
372 included: acceptability(295), anxiety(209), confidence(193), mental health (45,  
373 199, 220, 222, 276, 313), preparedness(135, 139, 142, 143, 153, 159, 257,  
374 269, 277, 327), satisfaction(30, 170, 198, 328-330), community cohesion(269)  
375 and social adaptation(291). Most of the learning interventions were given after  
376 health emergencies occurred. This would be related to the fact that quality of



377 life of the workers would be affected after the occurrence of these events. Two  
378 studies(193, 209), however, analyzed how quality of life could be improved by  
379 receiving prior training.

380

## 381 **Discussion**

382 We found 319 studies that analyzed different learning interventions and training  
383 methods during health emergencies. Information about virtual training (including  
384 online platforms, artificial intelligence, MOOC, the use of mobile devices, social  
385 networks and telemedicine) arose mainly during the COVID-19 pandemic.  
386 Before the pandemic, most of the studies focused on in-person training. This  
387 change could be explained by technological advancements, the need for new  
388 information that had to be updated quickly and also because of social  
389 distancing recommendations. Of note, access to new technologies was scaled  
390 up after 2020 as the pandemic accelerated this process.

391 Many studies analyzed the impact of training on clinical outcomes such as  
392 patient survival (19, 215), rate of workers infection(33, 41, 87), number of  
393 hospitalizations(99, 299) and number of correct diagnoses(86, 300). These  
394 findings will be important when developing guidance since these outcomes can  
395 be useful for decision making and selection of appropriate learning interventions  
396 and methods. Finally, the importance of coordinated work between different  
397 institutions(16, 25, 28, 38, 112, 238, 285), universities, governments and non-  
398 governmental organizations emerges was noted in several studies. How best to  
399 foster coordinated work between institutions may be of great interest for future  
400 research.

401 We also found some potential evidence gaps that are worth investigating in  
 402 future research studies. First, there is limited evidence on the content of  
 403 learning interventions, especially regarding ethical dilemmas and how to solve  
 404 them (71). Also, we found a scarcity of evidence on end-of-life management  
 405 during emergencies such as end-of-life care and managing deceased people.  
 406 Subsequently, we identified other evidence gaps such as lack of robust  
 407 evaluation of the effect of learning transfer, as most studies rely on self-reports  
 408 (also referred as post-training 'smile-sheets') to evaluate transfer of  
 409 learning(331-333). These studies provide limited actionable data to determine  
 410 the effectiveness of training programs, as getting a favorable reaction from  
 411 learners does not guarantee that learning transfer has been achieved(334).  
 412 Further, too little research has examined the accountability of trainers for  
 413 transfer in terms of using transfer-enhancing strategies, and how trainers are  
 414 being evaluated(335)  
 415 In addition, most studies focused on information dissemination to build skills  
 416 rather than employing evidence-informed training methods for performance  
 417 improvement at the time of emergencies. Poor learning design and evaluation  
 418 methods can result in learning being wasted(331). Lastly, there was a lack of  
 419 evidence on managing emergencies through teamwork, effective  
 420 communication, and stress management. After all, factors such as stress, poor  
 421 team dynamic due to hierarchical issues, and poor communication can lead to  
 422 morbidity or mortality.

423

## 424 **Limitations and strengths**

425 This scoping review has potential limitations and strengths. One such limitation  
426 was the time constraint to deliver the scoping review quickly. Despite following  
427 standard scoping review processes, the search was not as robust as when  
428 performing a systematic review. However, once the *Learning in Emergencies*  
429 guidance is under way and new systematic reviews on the subject are  
430 commissioned, new evidence may arise to complement these findings. Scoping  
431 reviews are limited in purpose, but often fulfill a vital first step in establishing the  
432 amount and type of evidence from which subsequent systematic reviews can be  
433 commissioned with greater certainty of feasibility. The scoping review followed  
434 an a priori protocol and was undertaken by a diverse team with varied expertise  
435 in the topic and scoping review methods.

436

## 437 **Conclusion**

438 Research on learning and learning dissemination during health emergencies  
439 has revealed considerable advancements, particularly in virtual learning.  
440 Overall, it is evident that learning during health emergencies appears to improve  
441 knowledge, management, quality of life, satisfaction and clinical outcomes. All  
442 the information provided by this review can give decision makers tools to select  
443 different types of learning interventions and methods for healthcare workers,  
444 volunteers, military, civilians and governments. This scoping review may also be  
445 useful for future research to address the identified evidence gaps.

446

## 447 **Acknowledgments**

448 The authors thank Aphaluck Bhatiasavi for reviewing this paper and the support  
449 of the Learning and Capacity Development Unit, the WHO Health Emergencies  
450 Programme and the World Health Organization.

451

## 452 **Funding**

453 This study did not receive any funding.

## 454     **References:**

- 455     1.     Nelson C., Lurie N., Wasserman J., Zakowski S. Conceptualizing and  
456     defining public health emergency preparedness. *Am J Public Health.* 2007;97  
457     Suppl 1(Suppl 1):S9-11.
- 458     2.     Kruk M. E. Emergency preparedness and public health systems lessons  
459     for developing countries. *Am J Prev Med.* 2008;34(6):529-34.
- 460     3.     Wynia M. K., Osborn C. Y. Health literacy and communication quality in  
461     health care organizations. *J Health Commun.* 2010;15 Suppl 2(Suppl 2):102-15.
- 462     4.     Stoto M. A., Reno C., Tsoleva S., Fantini M. P. The European experience  
463     with testing and surveillance during the first phase of the COVID-19 pandemic.  
464     2022.
- 465     5.     Vera San Juan N., Clark S. E., Camilleri M., Jeans J. P., Monkhouse A.,  
466     Chisnall G., Vindrola-Padros C. Training and redeployment of healthcare  
467     workers to intensive care units (ICUs) during the COVID-19 pandemic: a  
468     systematic review. *BMJ Open.* 2022;12(1):e050038.
- 469     6.     The Lancet Infectious Diseases. The COVID-19 infodemic. *Lancet Infect*  
470     *Dis.* 2020;20(8):875.
- 471     7.     Savoia Elena, Piltch-Loeb Rachael, Masterson Evelyn, Testa Marcia A.,  
472     Fantin Maria Pia, Tsoleva Svetla. Rapid Analysis of the First Year of the  
473     COVID-19 Pandemic Response for the Development of Preparedness  
474     Measures for Public Communication. 2022.
- 475     8.     Kaarakainen Meri-Tuulia, Saikkonen Loretta. Remark on digital  
476     accessibility: educational disparities define digital inclusion from adolescence  
477     onwards. *Universal Access in the Information Society.* 2022.

- 478 9. Spratt Jennifer, Florian Lani. Inclusive pedagogy: From learning to  
479 action. Supporting each individual in the context of 'everybody'. Teaching and  
480 Teacher Education. 2015;49:89-96.
- 481 10. Brunton G., Oliver S., Thomas J. Innovations in framework synthesis as a  
482 systematic review method. Res Synth Methods. 2020;11(3):316-30.
- 483 11. Tricco AC, Lillie, E, Zarin, W, O'Brien, KK, Colquhoun, H, Levac, D,  
484 Moher, D, Peters, MD, Horsley, T, Weeks, L, Hempel, S et al. PRISMA  
485 extension for scoping reviews (PRISMA-ScR): checklist and explanation. Ann  
486 Intern Med. 2018;169:467-73.
- 487 12. P Jordan, C Iwu-Jaja, E Mokoka, I Kearns, B Oamen, S de Lange, L  
488 Schutte, V Naidoo. Development of a training programme for professional  
489 nurses in South Africa - An educational response to the COVID-19 pandemic.  
490 Nursing open. 2023;10(1):377-84.
- 491 13. R Kharel, SP Regmi, T Lin, AC Levine, AR Aluisio. Training program for  
492 female community volunteers to combat COVID 19 in rural Nepal. Global health  
493 action. 2022;15(1):2134425.
- 494 14. M Caviglia, JA da Silva-Moniz, F Venturini, A Jambai, MJ Vandy, AR  
495 Wurie, MT Sartie, G Putoto, L Ragazzoni. Response to Mass-Casualty  
496 Incidents and Outbreaks: A Prehospital Disaster Training Package Developed  
497 for the National Emergency Medical Service in Sierra Leone. Prehospital and  
498 disaster medicine. 2022;37(5):701-5.
- 499 15. M Guragai, A Achanta, AY Gopez, J Niyotwambaza, LG Cardoso, NL  
500 Estavillo, M Dykstra. Medical Students' Response to the COVID-19 Pandemic:  
501 Experience and Recommendations from Five Countries. Perspectives in biology  
502 and medicine. 2020;63(4):623-31.

- 503 16. RH Marsh, C Plyler, M Miller, R Klar, M Adeiza, I Wachekwa, F  
504 Koomson, Jr Garlo JL, K Kruah, SC Lake, R Matte, R Cook, D Maweu, L Kerr,  
505 O Ogbuagu, K Talbert-Slagle, B Dahn. Facing COVID-19 in Liberia: Adaptations  
506 of the Resilient and Responsive Health Systems Initiative. *Annals of global*  
507 *health*. 2021;87(1):101.
- 508 17. S Uttekar, N MacDonald, WA Orenstein, M Danchin, V Blaser, A  
509 Thomson, L Menning, L Shimp, B Rath, R Limaye, D Esangbedo, S  
510 Abeyesekera, S Malue Nielsen, S Mackay, T Purnat, K Duraisamy, V  
511 Karthickeyan, A Siddique, N Thacker. Empowering Health Workers to Build  
512 Public Trust in Vaccination: Experience from the International Pediatric  
513 Association's Online Vaccine Trust Course, 2020-2021. *Vaccine*.  
514 2023;41(2):435-43.
- 515 18. N Perera, V Haldane, S Ratnapalan, S Samaraweera, M Karunathilake,  
516 C Gunarathna, P Bandara, P Kawirathne, X Wei. Implementation of a  
517 coronavirus disease 2019 infection prevention and control training program in a  
518 low-middle income country. *JBHI evidence implementation*. 2022;20(3):228-35.
- 519 19. Y Lu, G Rong, SP Yu, Z Sun, X Duan, Z Dong, H Xia, N Zhan, C Jin, J Ji,  
520 H Duan. Chinese military medical teams in the Ebola outbreak of Sierra Leone.  
521 *Journal of the Royal Army Medical Corps*. 2016;162(3):198-202.
- 522 20. JH Pek, HM Kang, V Anantharaman. Teaching Disaster Site Medical  
523 Support in Indonesia. *Disaster medicine and public health preparedness*.  
524 2020;14(6):733-8.
- 525 21. M Kochis, W Goessling. Learning During and From a Crisis: The  
526 Student-Led Development of a COVID-19 Curriculum. *Academic medicine :*  
527 *journal of the Association of American Medical Colleges*. 2021;96(3):399-401.

- 528 22. I Ntahobakurira, S Antara, TB Galgalo, JB Kakoma, C Karema, T  
529 Nyatanyi, R Theogene, O Mukabayire, D Lowrance, P Raghunathan, N  
530 Ayebazibwe, D Mukanga, P Nsubuga, A Binagwaho. The Rwanda Field  
531 Epidemiology and Laboratory Training Program: training skilled disease  
532 detectives. The Pan African medical journal. 2011;10:7.
- 533 23. ND Bustamante, SA Rouhani, S Kivlehan, KA Checkett, K Israel, S  
534 Toussaint, S Kayden. The Haiti Humanitarian Response Course: A Novel  
535 Approach to Local Responder Training in International Humanitarian Response.  
536 Prehospital and disaster medicine. 2020;35(2):220-4.
- 537 24. P Wuthisuthimethawee, S Satthaphong, W Phongphuttha, P Sarathep, T  
538 Piyasuwankul, SN Công, CN Đức, LN Nhu', NH Văn, JP Feliciano, AC Danac,  
539 M Ariani, B Donna, IA Isturini, P Saelim, K Pintatham, D Thepmanee, P  
540 Silapunt, S Limpaporn, K Yuddhasaraprasiddhi, et al. How the ARCH Project  
541 Could Contribute to Strengthening ASEAN Regional Capacities on Disaster  
542 Health Management (DHM). Prehospital and disaster medicine. 2022;37:s30-  
543 s43.
- 544 25. R Burlew, A Puckett, R Bailey, M Caffrey, S Brantley. Assessing the  
545 relevance, efficiency, and sustainability of HIV/AIDS in-service training in  
546 Nigeria. England2014 2014-4-17. 20 p.
- 547 26. C Macfarlane, AL Joffe, S Naidoo. Training of disaster managers at a  
548 masters degree level: from emergency care to managerial control. Emergency  
549 medicine Australasia : EMA. 2006;18(5):451-6.
- 550 27. HM Kang, JH Pek, A Venkataraman. Development of a Medical Support  
551 Training Program for Disaster Management in Indonesia: A Hospital Disaster



552 Medical Support Program for Indonesia. Disaster medicine and public health  
553 preparedness. 2021;15(6):777-84.

554 28. L Magaña-Valladares, C Rosas-Magallanes, A Montoya-Rodríguez, G  
555 Calvillo-Jacobo, CM Alpuche-Arande, S García-Saisó. A MOOC as an  
556 immediate strategy to train health personnel in the cholera outbreak in Mexico.  
557 BMC medical education. 2018;18(1):111.

558 29. B Engelbrecht, L Gilson, P Barker, K Vallabhjee, G Kantor, M Budden, A  
559 Parbhoo, U Lehmann. Prioritizing people and rapid learning in times of crisis: A  
560 virtual learning initiative to support health workers during the COVID-19  
561 pandemic. The International journal of health planning and management.  
562 2021;36:168-73.

563 30. L Leitch, E Miller-Karas. A case for using biologically-based mental  
564 health intervention in post-earthquake china: evaluation of training in the trauma  
565 resiliency model. International journal of emergency mental health.  
566 2009;11(4):221-33.

567 31. YM Ng, PLP Or. Coronavirus disease (COVID-19) prevention: Virtual  
568 classroom education for hand hygiene. Scotland2020 2020-5. 102782 p.

569 32. SA Patel, G Chavan, M Gudhe, A Upadhye, V Lohana, A Patel, V  
570 Anjankar. Simulation-based ventilatory training for the caregivers at primary and  
571 rural health care workers in Central India for dealing with COVID-19 pandemic:  
572 recommendations. Journal of complementary & integrative medicine.  
573 2022;19(2):493-7.

574 33. L Liu, H Yin, D Liu. Zero Health Worker Infection: Experiences From the  
575 China Ebola Treatment Unit During the Ebola Epidemic in Liberia. Disaster  
576 medicine and public health preparedness. 2017;11(2):262-6.

- 577 34. AC Chua, YS Leo, CC Lee. Building partnerships to address the HIV  
578 epidemic. Singapore medical journal. 2008;49(5):376-9.
- 579 35. F Cruz-Vega, J Loría-Castellanos, IP Hernández-Olivas, R Franco-Bey,  
580 C Ochoa-Avila, V Sánchez-Badillo. [Experience in training in emergencies,  
581 Division of Special Projects in Health, Instituto Mexicano del Seguro Social].  
582 Cirugia y cirujanos. 2016;84(2):127-34.
- 583 36. AO Talisuna, B Bonkougou, FS Mosha, BB Struminger, J Lehmer, S  
584 Arora, IN Conteh, JA Appiah, J Nel, S Mehtar, JV Diaz, M Lado, CB Ramers,  
585 KB Ousman, P Gaturuku, A Tiendrebeogo, R Mihigo, Z Yoti, FC Kasolo, JW  
586 Cabore, et al. The COVID-19 pandemic: broad partnerships for the rapid scale  
587 up of innovative virtual approaches for capacity building and credible  
588 information dissemination in Africa. The Pan African medical journal.  
589 2020;37:255.
- 590 37. SK Hou, Q Lv, H Ding, YZ Zhang, BG Yu, ZQ Liu, B Su, JY Liu, MY Yu,  
591 ZG Sun, HJ Fan. Disaster Medicine in China: Present and Future. Disaster  
592 medicine and public health preparedness. 2018;12(2):157-65.
- 593 38. PA McQuilkin, M Niescierenko, AM Beddoe, J Goentzel, EA Graham, PC  
594 Henwood, L Rehwaldt, S Teklu, J Tupesis, R Marshall. Academic Medical  
595 Support to the Ebola Virus Disease Outbreak in Liberia. Academic medicine :  
596 journal of the Association of American Medical Colleges. 2017;92(12):1674-9.
- 597 39. JJ Hemingway-Foday, BF Ngoyi, C Tunda, KB Stolka, KEL Grimes, L  
598 Lubula, M Mossoko, BI Kebela, LM Brown, PDM MacDonald. Lessons Learned  
599 from Reinforcing Epidemiologic Surveillance During the 2017 Ebola Outbreak in  
600 the Likati District, Democratic Republic of the Congo. Health security.  
601 2020;18:S81-S91.

- 602 40. K Yao, W Wafula, EC Bile, R Cheignsong, S Howard, A Demby, J  
603 Nkengasong. Ensuring the quality of HIV rapid testing in resource-poor  
604 countries using a systematic approach to training. American journal of clinical  
605 pathology. 2010;134(4):568-72.
- 606 41. P Bemah, A Baller, C Cooper, M Massaquoi, L Skrip, JM Rude, A  
607 Twyman, P Moses, R Seifeldin, K Udhayashankar, K Enrique, M Niescierenko,  
608 C Owen, L Brown, B Boukaré, D Williams, T Nyenswah, F Kateh, B Dahn, A  
609 Gasasira, et al. Strengthening healthcare workforce capacity during and post  
610 Ebola outbreaks in Liberia: an innovative and effective approach to epidemic  
611 preparedness and response. The Pan African medical journal. 2019;33:9.
- 612 42. MO Oji, M Haile, A Baller, N Tremblay, N Mahmoud, A Gasasira, V  
613 Ladele, C Cooper, FN Kateh, T Nyenswah, P Nsubuga. Implementing infection  
614 prevention and control capacity building strategies within the context of Ebola  
615 outbreak in a "Hard-to-Reach" area of Liberia. The Pan African medical journal.  
616 2018;31:107.
- 617 43. K Limpakarnjanarat, RW Linkins, E Emerson, WL Aldis, C Jiraphongsa,  
618 K Ungchusak. Long-term capacity-building in public health emergency  
619 preparedness in Thailand--short report. Asia-Pacific journal of public health.  
620 2007;19:13-7.
- 621 44. MN Cherian, L Noel, Y Buyanjargal, G Salik. Essential emergency  
622 surgical, procedures in resource-limited facilities: a WHO workshop in Mongolia.  
623 World hospitals and health services : the official journal of the International  
624 Hospital Federation. 2004;40(4):24-9.

- 625 45. L Vijaykumar, R Thara, S John, S Chellappa. Psychosocial interventions  
626 after tsunami in Tamil Nadu, India. International review of psychiatry (Abingdon,  
627 England). 2006;18(3):225-31.
- 628 46. A Rajasingham, A Bowen, C O'Reilly, K Sholtes, K Schilling, C Hough, J  
629 Brunkard, JW Domercant, G Lerebours, J Cadet, R Quick, B Person. Cholera  
630 prevention training materials for community health workers, Haiti, 2010–2011.  
631 Emerging infectious diseases. 2011;17(11):2162-5.
- 632 47. YA Shin, J Yeo, K Jung. The Effectiveness of International Non-  
633 Governmental Organizations' Response Operations during Public Health  
634 Emergency: Lessons Learned from the 2014 Ebola Outbreak in Sierra Leone.  
635 International journal of environmental research and public health. 2018;15(4).
- 636 48. JA Ripp, J Bork, H Koncicki, R Asgary. The response of academic  
637 medical centers to the 2010 Haiti earthquake: the Mount Sinai School of  
638 Medicine experience. The American journal of tropical medicine and hygiene.  
639 2012;86(1):32-5.
- 640 49. O Maduka, O Odia. Ethical challenges of containing Ebola: the Nigerian  
641 experience. Journal of medical ethics. 2015;41(11):917-9.
- 642 50. SB Math, SC Girimaji, V Benegal, GS Uday Kumar, A Hamza, D  
643 Nagaraja. Tsunami: psychosocial aspects of Andaman and Nicobar islands.  
644 Assessments and intervention in the early phase. International review of  
645 psychiatry (Abingdon, England). 2006;18(3):233-9.
- 646 51. W Bazeyo, RW Mayega, GC Orach, J Kiguli, S Mamuya, JS Tabu, L  
647 Sena, E Rugigana, M Mapatano, D Lewy, N Mock, G Burnham, M Keim, J  
648 Killewo. Regional approach to building operational level capacity for disaster

- 649 planning: the case of the Eastern Africa region. *East African journal of public*  
650 *health*. 2013;10(2):447-58.
- 651 52. S Yi, OF Umuhire, D Uwamahoro, M Guptill, GN Cattermole. Developing  
652 and implementing a global emergency medicine course: Lessons learned from  
653 Rwanda. *Education for health* (Abingdon, England). 2017;30(3):203-10.
- 654 53. GC Orach, S Mamuya, RW Mayega, SJ Tabu, J Kiguli, A Keim, D  
655 Menya, N Mock, G Burnham, J Killewo, W Bazeyo. Use of the Automated  
656 Disaster and Emergency Planning Tool in developing district level public health  
657 emergency operating procedures in three East African countries. *East African*  
658 *journal of public health*. 2013;10(2):439-46.
- 659 54. W Bazeyo, J Bagonza, A Halage, G Okure, M Mugagga, R Musoke, M  
660 Tumwebaze, S Tusiime, S Ssendagire, I Nabukenya, S Pande, C Aanyu, S  
661 Etajak, E Rutebemberwa. Ebola a reality of modern Public Health; need for  
662 Surveillance, Preparedness and Response Training for Health Workers and  
663 other multidisciplinary teams: a case for Uganda. *The Pan African medical*  
664 *journal*. 2015;20:404.
- 665 55. K Olness, M Sinha, M Herran, M Cheren, S Pairojkul. Training of health  
666 care professionals on the special needs of children in the management of  
667 disasters: experience in Asia, Africa, and Latin America. *Ambulatory pediatrics :*  
668 *the official journal of the Ambulatory Pediatric Association*. 2005;5(4):244-8.
- 669 56. CG Orach, RW Mayega, V Woboya, B William. Performance of district  
670 disaster management teams after undergoing an operational level planners'  
671 training in Uganda. *East African journal of public health*. 2013;10(2):459-68.

- 672 57. D Pérez-Manchón. [Telemedicine, a medical social network for  
673 humanitarian aid between Spain and Cameroon]. Gaceta sanitaria.  
674 2015;29(1):59-61.
- 675 58. K Meade, DM Lam. A deployable telemedicine capability in support of  
676 humanitarian operations. Telemedicine journal and e-health : the official journal  
677 of the American Telemedicine Association. 2007;13(3):331-40.
- 678 59. A Hess, T Thomas, R Contreras, GB Green. Development of emergency  
679 medical services in Guatemala. Prehospital emergency care. 2004;8(3):308-12.
- 680 60. S Yamada, AM Durand, TH Chen, GG Maskarinec. Interdisciplinary  
681 problem-based learning as a method to prepare Micronesia for public health  
682 emergencies. Pacific health dialog. 2007;14(1):98-102.
- 683 61. PN Kizakevich, A Culwell, R Furberg, D Gemeinhardt, S Grantlin, R  
684 Hubal, A Stafford, RT Dombroski. Virtual simulation-enhanced triage training for  
685 Iraqi medical personnel. Studies in health technology and informatics.  
686 2007;125:223-8.
- 687 62. G O'Reilly, M Fitzgerald, PL Ariyananda, S Williams, L Smith, T Jones, S  
688 Charlton, S Young, L Dziukas, Z Fisher, S Wragg, E Burke. In the wake of Sri  
689 Lanka's tsunami: the health for the south capacity-building project. Emergency  
690 medicine Australasia : EMA. 2008;20(2):175-9.
- 691 63. W AlAssaf. Challenges in Pandemic Disaster Preparedness: Experience  
692 of a Saudi Academic Medical Center. Disaster medicine and public health  
693 preparedness. 2022;16(1):285-9.
- 694 64. GJ Button, M Acosta, S Ramsey, Y Francis, S Zuerlein. Utilizing a  
695 "Crawl, Walk, Run" Training Model to Enhance Field Sanitation Capabilities for

696 Peacekeeping Forces: A Recommendation for the Department of Defense  
697 Global Health Engagement Enterprise. Military medicine. 2022.

698 65. HC Oliveira, LC Souza, TC Leite, JF Campos. Personal Protective  
699 Equipment in the coronavirus pandemic: training with Rapid Cycle Deliberate  
700 Practice. Revista brasileira de enfermagem. 2020;73:e20200303.

701 66. MJ Morton Hamer, PL Reed, JD Greulich, CW Beadling. Enhancing  
702 Global Health Security: US Africa Command's Disaster Preparedness Program.  
703 Disaster medicine and public health preparedness. 2019;13(2):319-29.

704 67. M Lubogo, B Donewell, L Godbless, S Shabani, J Maeda, H Temba, TC  
705 Malibiche, N Berhanu. Ebola virus disease outbreak; the role of field  
706 epidemiology training programme in the fight against the epidemic, Liberia,  
707 2014. The Pan African medical journal. 2015;22:5.

708 68. L Lin, I Ashkenazi, BC Dorn, E Savoia. The public health system  
709 response to the 2008 Sichuan province earthquake: a literature review and  
710 interviews. Disasters. 2014;38(4):753-73.

711 69. Q He, H Xiao, HM Li, BB Zhang, CW Li, FJ Yuan, SS Yu, F Zhang, P  
712 Kong. Practice in Information Technology Support for Fangcang Shelter  
713 Hospital during COVID-19 Epidemic in Wuhan, China. Journal of medical  
714 systems. 2021;45(4):42.

715 70. L Kenar, T Karayilanoglu. Medical preparedness against chemical and  
716 biological incidents for the NATO Summit in Istanbul and lessons learned.  
717 United States2006 2006-7. 268-71 p.

718 71. RA Werdhani, A Findyartini, DA Kusumoningrum, C Hanum, D Muktiarti,  
719 O Safitry, W Wisnu, DS Soemarko, RL Sutanto. A COVID-19 self-isolation  
720 monitoring module for FMUI undergraduate medical students: Linking learning

721 and service needs during the pandemic surge in Indonesia. PloS one.  
722 2022;17(12):e0279742.

723 72. W Cai, R Gao, Q Jing, C Wang, N Hou, W Liu, Q Gao, X Sun. Doctor of  
724 Public Health-Crisis Management and COVID-19 Prevention and Control: A  
725 Case Study in China. Frontiers in public health. 2022;10:814632.

726 73. JC Hageman, C Hazim, K Wilson, P Malpiedi, N Gupta, S Bennett, A  
727 Kolwaite, A Tumpey, K Brinsley-Rainisch, B Christensen, C Gould, A Fisher, M  
728 Jhung, D Hamilton, K Moran, L Delaney, C Dowell, M Bell, A Srinivasan, M  
729 Schaefer, et al. Infection Prevention and Control for Ebola in Health Care  
730 Settings - West Africa and United States. MMWR supplements. 2016;65(3):50-  
731 6.

732 74. R Brisebois, P Hennecke, R Kao, V McAlister, J Po, R Stiegelmar, H  
733 Tien. The Role 3 Multinational Medical Unit at Kandahar Airfield 2005-2010.  
734 Canadian journal of surgery Journal canadien de chirurgie. 2011;54(6):S124-9.

735 75. M Gertler, S Loik, C Kleine, A Matuschek, N Gresser, M di Gennaro, A  
736 Fabricius, T Kratz, A Stich, J Butenop. [West Africa Ebola outbreak - immediate  
737 and hands-on formation: the pre-deployment training program for frontline aid  
738 workers of the German Red Cross, other aid organizations, and the German  
739 Armed Forces, Wuerzburg, Germany 2014/15]. Bundesgesundheitsblatt,  
740 Gesundheitsforschung, Gesundheitsschutz. 2018;61(4):394-403.

741 76. H Boon, RA Ruiter, S James, B Van Den Borne, E Williams, P Reddy.  
742 The impact of a community-based pilot health education intervention for older  
743 people as caregivers of orphaned and sick children as a result of HIV and AIDS  
744 in South Africa. Journal of cross-cultural gerontology. 2009;24(4):373-89.



- 745 77. S Subedi, GN Sharma, S Dahal, MR Banjara, BD Pandey. The Health  
746 Sector Response to the 2015 Earthquake in Nepal. Disaster medicine and  
747 public health preparedness. 2018;12(4):543-7.
- 748 78. DP Evans, M Anderson, C Shahpar, C Del Rio, JW Curran. Innovation in  
749 Graduate Education for Health Professionals in Humanitarian Emergencies.  
750 Prehospital and disaster medicine. 2016;31(5):532-8.
- 751 79. CBD Silva, LL Trindade, M Kolhs, SV Barimacker, L Schacht, M  
752 Bordignon. Implementation of COVID-19 telemonitoring: repercussions in  
753 Nursing academic training. Revista gaucha de enfermagem.  
754 2021;42:e20200395.
- 755 80. V Rouzier, K Severe, MAJ Juste, M Peck, C Perodin, P Severe, MM  
756 Deschamps, RI Verdier, S Prince, J Francois, JR Cadet, FD Guillaume, PF  
757 Wright, JW Pape. Cholera vaccination in urban Haiti. The American journal of  
758 tropical medicine and hygiene. 2013;89(4):671-81.
- 759 81. A Finnegan, S Finnegan, D Bates, D Ritsperis, K McCourt, M Thomas.  
760 Preparing British Military nurses to deliver nursing care on deployment. An  
761 Afghanistan study. Nurse education today. 2015;35(1):104-12.
- 762 82. S Schreiber, N Yoeli, G Paz, GI Barbash, D Varssano, N Fertel, A  
763 Hassner, M Drory, P Halpern. Hospital preparedness for possible  
764 nonconventional casualties: an Israeli experience. General hospital psychiatry.  
765 2004;26(5):359-66.
- 766 83. GA Phillips, ZW Soe, JH Kong, C Curry. Capacity building for emergency  
767 care: Training the first emergency specialists in Myanmar. Emergency medicine  
768 Australasia : EMA. 2014;26(6):618-26.

- 769 84. A Mosquera, M Braun, M Hulett, L Ryszka. U.S. Public Health Service  
770 Response to the 2014-2015 Ebola Epidemic in West Africa: A Nursing  
771 Perspective. Public health nursing (Boston, Mass). 2015;32(5):550-4.
- 772 85. S Ikeda, P Silapunt. Introduction to the Project for Strengthening the  
773 ASEAN Regional Capacity on Disaster Health Management (ARCH Project).  
774 Prehospital and disaster medicine. 2022;37:s1-s10.
- 775 86. Al Iskanderani, IM Mehedi, AJ Aljohani, M Shorfuzzaman, F Akther, T  
776 Palaniswamy, SA Latif, A Latif, A Alam. Artificial Intelligence and Medical  
777 Internet of Things Framework for Diagnosis of Coronavirus Suspected Cases.  
778 Journal of healthcare engineering. 2021;2021:3277988.
- 779 87. D Kimani, L Ndegwa, M Njeru, E Wesangula, F Mboya, C Macharia, J  
780 Oliech, H Weyenga, G Owiso, K Irungu, UO Luvsansharav, A Herman-Roloff.  
781 Adopting World Health Organization Multimodal Infection Prevention and  
782 Control Strategies to Respond to COVID-19, Kenya. Emerging infectious  
783 diseases. 2022;28(13):S247-S54.
- 784 88. X Hu, L Liu, Z Xu, J Yang, H Guo, L Zhu, WH Lamers, Y Wu. Creation  
785 and application of war trauma treatment simulation software for first aid on the  
786 battlefield based on undeformed high-resolution sectional anatomical image  
787 (Chinese Visible Human dataset). BMC medical education. 2022;22(1):498.
- 788 89. N Bajow, A Djalali, PL Ingrassia, H Ageely, I Bani, F Della Corte.  
789 Proposal for a community-based disaster management curriculum for medical  
790 school undergraduates in Saudi Arabia. American journal of disaster medicine.  
791 2015;10(2):145-52.
- 792 90. VY Sohn, JP Miller, CA Koeller, SO Gibson, KS Azarow, JB Myers, AC  
793 Beekley, JA Sebesta, JB Christensen, Jr Rush RM. From the combat medic to

- 794 the forward surgical team: the Madigan model for improving trauma readiness  
795 of brigade combat teams fighting the Global War on Terror. The Journal of  
796 surgical research. 2007;138(1):25-31.
- 797 91. T Cerqueira-Silva, R Carreiro, V Nunes, L Passos, BF Canedo, S  
798 Andrade, PIP Ramos, R Khouri, CBS Santos, JDS Nascimento, AA Paste, IM  
799 Paiva Filho, M Santini-Oliveira, Á Cruz, M Barral-Netto, V Boaventura. Bridging  
800 Learning in Medicine and Citizenship During the COVID-19 Pandemic: A  
801 Telehealth-Based Case Study. JMIR public health and surveillance.  
802 2021;7(3):e24795.
- 803 92. Leochico C. F. D., Mojica J. A. P., Rey-Matias R. R., Supnet I. E., Ignacio  
804 S. D. Role of Telerehabilitation in the Rehabilitation Medicine Training Program  
805 of a COVID-19 Referral Center in a Developing Country. Am J Phys Med  
806 Rehabil. 2021;100(6):526-32.
- 807 93. BM Pereira, ML Ryan, MP Ogilvie, JC Gomez-Rodriguez, P McAndrew,  
808 GD Garcia, KG Proctor. Predeployment mass casualty and clinical trauma  
809 training for US Army forward surgical teams. The Journal of craniofacial  
810 surgery. 2010;21(4):982-6.
- 811 94. S Philip, R Patley, R Chander, P Varshney, AC Dosajh, B Vinay, N  
812 Manjunatha, CN Kumar, S BadaMath. A report on successful introduction of tele  
813 mental health training for primary care doctors during the COVID 19 pandemic.  
814 Asian journal of psychiatry. 2022;68:102967.
- 815 95. MB Brearley. Pre-deployment Heat Acclimatization Guidelines for  
816 Disaster Responders. Prehospital and disaster medicine. 2016;31(1):85-9.

- 817 96. I Gareev, A Gallyametdinov, O Beylerli, E Valitov, A Alyshov, V Pavlov, A  
818 Izmailov, S Zhao. The opportunities and challenges of telemedicine during  
819 COVID-19 pandemic. *Frontiers in bioscience (Elite edition)*. 2021;13(2):291-8.
- 820 97. S Jensen, MD Tadlock, T Douglas, M Provencher, Jr Ignacio RC.  
821 Integration of Surgical Residency Training With US Military Humanitarian  
822 Missions. *Journal of surgical education*. 2015;72(5):898-903.
- 823 98. C Choufani, O Barbier, T Demoures, L Mathieu, S Rigal. Evaluation of a  
824 fellowship abroad as part of the initial training of the French military surgeon.  
825 *BMJ military health*. 2021;167(3):168-71.
- 826 99. N Tashkandi, M Aljuaid, T McKerry, J Alchin, L Taylor, EJ Catangui, R  
827 Mulla, S Sinnappan, G Nammour, A El-Saed, MM Alshamrani. Nursing strategic  
828 pillars to enhance nursing preparedness and response to COVID-19 pandemic  
829 at a tertiary care hospital in Saudi Arabia. *Journal of infection and public health*.  
830 2021;14(9):1155-60.
- 831 100. M Chiu, A Goldberg, S Moses, P Scala, C Fine, P Ryan. Developing and  
832 Implementing a Dedicated Prone Positioning Team for Mechanically Ventilated  
833 ARDS Patients During the COVID-19 Crisis. *Joint Commission journal on*  
834 *quality and patient safety*. 2021;47(6):347-53.
- 835 101. A Ripoll-Gallardo, L Ragazzoni, E Mazzanti, G Meneghetti, JM Franc, A  
836 Costa, F Della Corte. Residents working with Médecins Sans Frontières:  
837 training and pilot evaluation. *England*2020 2020-8-25. 86 p.
- 838 102. S Daniel, C Venkateswaran, P Sunder, S Nair, RK Chittazhathu, AJ  
839 Manuel, B Raghavan, MMS Kumar, V Rijju, G Vijay, S Rao, AV Prabhu, U  
840 Parameswaran, O Spruijt, MR Rajagopal, M Leng. Responding to Palliative  
841 Care Training Needs in the Coronavirus Disease 2019 Era: The Context and

- 842 Process of Developing and Disseminating Training Resources and Guidance for
- 843 Low- and Middle-Income Countries from Kerala, South India. Indian journal of
- 844 palliative care. 2020;26:S8-S16.
- 845 103. A Downie, T Mashanya, B Chipwaza, F Griffiths, B Harris, A Kalolo, S
- 846 Ndegese, J Sturt, N De Valliere, S Pemba. Remote Consulting in Primary
- 847 Health Care in Low- and Middle-Income Countries: Feasibility Study of an
- 848 Online Training Program to Support Care Delivery During the COVID-19
- 849 Pandemic. JMIR formative research. 2022;6(6):e32964.
- 850 104. M Usami, MFT Lomboy, N Satake, CAM Estrada, M Kodama, Jr
- 851 Gregorio ER, Y Suzuki, RB Uytico, MP Molon, I Harada, K Yamamoto, K
- 852 Inazaki, H Ushijima, C Leynes, J Kobayashi, RR Quizon, T Hayakawa.
- 853 Addressing challenges in children's mental health in disaster-affected areas in
- 854 Japan and the Philippines - highlights of the training program by the National
- 855 Center for Global Health and Medicine. England; 2018 2018. Report No.: 1753-
- 856 6561 (Print).
- 857 105. P Buyego, E Katwesigye, G Kebirungi, M Nsubuga, S Nakyejwe, P Cruz,
- 858 M McCarthy, D Hurt, A Kambugu, JW Arinaitwe, U Ssekabira, D Jjingo.
- 859 Feasibility of Virtual Reality based Training for Optimising COVID-19 Case
- 860 Handling in Uganda. United States2021 2021-10-4.
- 861 106. MM Fuenfer, PC Spinella, AL Naclerio, KM Creamer. The U.S. military
- 862 wartime pediatric trauma mission: how surgeons and pediatricians are adapting
- 863 the system to address the need. Military medicine. 2009;174(9):887-91.
- 864 107. L Macht, D Worlitzsch, N Braijoshri, P Bequiri, J Zudock, M Zilezinski, D
- 865 Stoevesandt, J Smith, S Hofstetter. COVID-19: Development and
- 866 implementation of a video-conference-based educational concept to improve

867 the hygiene skills of health and nursing professionals in the Republic of Kosovo.  
868 GMS hygiene and infection control. 2022;17:Doc09.

869 108. G Jobson, M Mabitsi, J Railton, CJ Grobbelaar, JA McIntyre, HE  
870 Struthers, RPH Peters. Targeted mentoring for human immunodeficiency virus  
871 programme support in South Africa. Southern African journal of HIV medicine.  
872 2019;20(1):873.

873 109. JR Zelnick, B Seepamore, A Daftary, KR Amico, X Bhengu, G Friedland,  
874 N Padayatchi, K Naidoo, MR O'Donnell. Training social workers to enhance  
875 patient-centered care for drug-resistant TB-HIV in South Africa. Public health  
876 action. 2018;8(1):25-7.

877 110. R Cena-Navarro, RJ Vitor, RJ Canoy, A Dela Tonga, GE Ulanday, MRC  
878 Silva, RV Destura. Biosafety Capacity Building During the COVID-19 Pandemic:  
879 Results, Insights, and Lessons Learned from an Online Approach in the  
880 Philippines. Applied biosafety : journal of the American Biological Safety  
881 Association. 2022;27(1):42-50.

882 111. AJ Richard, CI Lee, MG Richard, EK Oo, T Lee, L Stock. Essential  
883 trauma management training: addressing service delivery needs in active  
884 conflict zones in eastern Myanmar. Human resources for health. 2009;7:19.

885 112. DJ Irizarry, C Tate, MT Bingham, PF Wey, E Batjom, TA Nicholas, BH  
886 Boedeker. Advanced Medical Technology Capacity Building and the Medical  
887 Mentoring Event: A Unique Application of SOF Counterinsurgency Medical  
888 Engagement Strategies. Journal of special operations medicine : a peer  
889 reviewed journal for SOF medical professionals. 2012;12(1):24-30.

890 113. G Wanjiku, L Dreizler, G Bell, B Wachira. Feasibility of project ECHO  
891 telementoring to build capacity among non-specialist emergency care providers.

892 African journal of emergency medicine : Revue africaine de la medecine  
893 d'urgence. 2022;12(4):352-7.

894 114. T Ahluwalia, S Gidwani, K Douglass. Effectiveness of remote practical  
895 boards and telesimulation for the evaluation of emergency medicine trainees in  
896 India. AEM education and training. 2021;5(4):e10686.

897 115. J Liesveld, K Petrovic, S Grohman. Teaching disaster preparedness to  
898 pre-licensure students: A collaborative project during the pandemic. Teaching  
899 and learning in nursing : official journal of the National Organization for Associate  
900 Degree Nursing. 2022.

901 116. PM Fernández-Miranda, PS Bellón, AP Del Barrio, LL Iglesias, PS  
902 García, F Aguilar-Gómez, DR González, JA Vega. Developing a Training Web  
903 Application for Improving the COVID-19 Diagnostic Accuracy on Chest X-ray.  
904 Journal of digital imaging. 2021;34(2):242-56.

905 117. H de Lesquen, M Bergez, A Vuong, A Boufime-Jonqheere, N de  
906 l'Escalopier. Adding the Capacity for an Intensive Care Unit Dedicated to  
907 COVID 19, Preserving the Operational Capability of a French Golden Hour  
908 Offset Surgical Team in Sahel. Military medicine. 2020.

909 118. SS Patel, RM Grace, P Chellew, M Prodanchuk, O Romaniuk, Y  
910 Skrebets, SA Ryzhenko, TB Erickson. "Emerging Technologies and Medical  
911 Countermeasures to Chemical, Biological, Radiological, and Nuclear (CBRN)  
912 Agents in East Ukraine". Conflict and health. 2020;14:24.

913 119. A Al-Hadidi, M Amine, A Batman, W Hakmeh. Homemade cardiac and  
914 vein cannulation ultrasound phantoms for trauma management training in  
915 resource-limited settings. Avicenna journal of medicine. 2021;11(1):42-5.

- 916 120. R.W. Klomp, L. Jones, E. Watanabe, Thompson W.W. AO - Klomp  
917 Richard W., <https://orcid.org/---> ORCID:. CDC's Multiple Approaches to  
918 Safeguard the Health, Safety, and Resilience of Ebola Responders. Prehospital  
919 and disaster medicine. 2020;35(1):69-75.
- 920 121. S. Van Hulle, J. Lewinski, G. Nana, C. Yameni, D. Guinot, S.M. Sangare.  
921 Tailoring malaria routine activities within the covid-19 pandemic: A risk and  
922 mitigation assessment of eight countries in West Africa. American Journal of  
923 Tropical Medicine and Hygiene. 2020;103(5):423.
- 924 122. E.M. Mitchell, R. Ackard, M.D. McLean Estrada, D. Hodgson, A.  
925 Thompson-Heisterman, A.S.A. Bonilla, C. Foronda. A partnership to develop  
926 disaster simulations for nursing students in response to climate change:  
927 description of a programme in Bluefields, Nicaragua, and Virginia, USA. The  
928 Lancet Global Health. 2020;8:S45.
- 929 123. W. Amini, M.I. Aman, Y. Khader, M. Shaheen. Epidemiological profile of  
930 crimean congo hemorrhagic fever (CCHF) in afghanistan: A teaching-case study.  
931 Pan African Medical Journal. 2019;33:6.
- 932 124. Z. Al-Mayahi, K. Anis, N. Al-Shaqsi, A. Al-Hattali, A. Al-Dhoyani, M.  
933 Nageeb, Y. Khader. Surveillance gaps analysis and impact of the late detection  
934 of the first middle east respiratory syndrome case in south batinah, oman: A  
935 teaching case-study. Pan African Medical Journal. 2019;33:13.
- 936 125. K. Pelican, S. Tzipori, J. Bender. Building an Ebola-Ready workforce:  
937 Lessons learned on strengthening the global workforce through university  
938 networks. American Journal of Tropical Medicine and Hygiene.  
939 2019;101(5):431.



940 126. J. Edem-Hotah, W. McDonald, P.M. Abu, E.T. Luman, R.J. Carter, A.  
941 Koker, S.T. Goldstein. Utilizing Nurses to Staff an Ebola Vaccine Clinical Trial in  
942 Sierra Leone during the Ebola Outbreak. *Journal of Infectious Diseases*.  
943 2018;217:S60-S4.

944 127. G. Mbanjumucyo, E. Nahayo, N. Polzin-Rosenberg, G.N. Cattermole.  
945 Major incident simulation in Rwanda: A report of two exercises. *African Journal*  
946 *of Emergency Medicine*. 2018;8(2):75-8.

947 128. R. Andrews, L. Quintana, T. Khan. Computer-assisted disaster response:  
948 Benefits for global healthcare. *International Journal of Computer Assisted*  
949 *Radiology and Surgery*. 2018;13:S144-S6.

950 129. T.E.C. Jones-Konneh, A. Murakami, H. Sasaki, S. Egawa. Intensive  
951 education of health care workers improves the outcome of ebola virus disease:  
952 Lessons learned from the 2014 outbreak in Sierra Leone. *Tohoku Journal of*  
953 *Experimental Medicine*. 2017;243(2):101-5.

954 130. T. Phaup, M. Lunda, J. Haloka, C. Kayumba, A. Stark, S. Weissman.  
955 Increasing access to HIV treatment and care services for key populations in  
956 zambia: A partnership approach to strengthening local capacity to provide  
957 sensitivity training to health workers. *Annals of Global Health*. 2017;83(1):162-3.

958 131. A. Laudisoit, E. Verheyen, P. Baelo, I. Akonda, C. Nebesse, S. Ngoy, G.  
959 Gembu, F. Tepage, J.J. Muyembe, O. Alworonga, D. Mande, Z. Angotolwa, H.  
960 Leirs, D. Ngbonda, R. Colebunders. A One Health team to improve Monkeypox  
961 virus outbreak response: An example from the Democratic Republic of the  
962 Congo. *Tropical Medicine and International Health*. 2017;22:53.

963 132. S. Umar, O. Ashraf, M. Ur Rahman, S.S. Shah. Learningthroughservice:  
964 'shifa homes'a project of Shifa College of Medicine for rehabilitation of flood  
965 victims. Journal of General Internal Medicine. 2017;32(2):S690-S1.

966 133. R.G. Vaz, P. Mkanda, R. Banda, W. Komkech, O.O. Ekundare-  
967 Famiyesin, R. Onyibe, S. Abidoye, P. Nsubuga, S. Maleghemi, B. Hannah-  
968 Murele, S.G. Tegegne. The role of the polio program infrastructure in response  
969 to Ebola virus disease outbreak in Nigeria 2014. Journal of Infectious Diseases.  
970 2016;213:S140-S6.

971 134. R.M.G.J. Houben, M. Lalli, T. Sumner, M. Hamilton, D. Pedrazzoli, F.  
972 Bonsu, P. Hippner, Y. Pillay, M. Kimerling, S. Ahmedov, C. Pretorius, R.G.  
973 White. TIME Impact - a new user-friendly tuberculosis (TB) model to inform TB  
974 policy decisions. BMC Medicine. 2016;14(1):56.

975 135. D.L. Garde, A.M.R. Hall, R.H. Marsh, K.P. Barron, K.L. Dierberg, A.P.  
976 Koroma. Implementation of the first dedicated Ebola screening and isolation for  
977 maternity patients in Sierra Leone. Annals of Global Health. 2016;82(3):418.

978 136. X.-P. Shao, Q. Zhou, J.-T. Ju, H.-G. Xin, J. Chen, C.-L. Wan, Y. Lu.  
979 Evaluation of anti-Ebola training system in the PLA Medical Team to Liberia and  
980 some suggestion. Academic Journal of Second Military Medical University.  
981 2015;36(8):822-7.

982 137. J.L. Livingston, A.M. Pickrell, A. Kumar, R.L. Bush, D.M. Vanderpool.  
983 Healthcare capacity building in Haiti: Training healthcare and non-healthcare  
984 providers in basic cardiopulmonary resuscitation. American Journal of Tropical  
985 Medicine and Hygiene. 2015;93(4):209.

986 138. L. Berry, T. Button, C. Fonnies, M. King. How to set up an Ebola isolation  
987 unit: Lessons learned from Rokupa. Journal of Clinical Virology. 2015;70:S17.

139. M.M. El-Bahnasawy. Mosquito borne West Nile virus infection as a major  
threat. *Tropical Medicine and International Health*. 2015;20:407.

140. S. Ariel, D. Keith, D. Martinez-Ortiz, P. Prosky, L. Shi, A. Tiurean, R.G.  
Whiteside. The birth of family therapists: The kosova systemic family therapy  
training program. *Journal of Family Psychotherapy*. 2014;25(3):225-45.

141. M. Acevedo, O. Chinchu, E. Cornelio, I. Martinez, V. Curaca, A. Palacios,  
C. Ugarte. Organization of the health system response to the 2009 H1N1  
influenza pandemic in a hospital in Lima, Peru. *American Journal of Tropical  
Medicine and Hygiene*. 2013;89(5):46-7.

142. M. Hasanovic, S. Morgan, S. Oakley, I. Pajevic. EMDR training for  
bosnia-herzegovina mental health workers in sarajevo as continuity of the  
building of psychotherapy capacity aftermath the 1992-1995 war. *European  
Psychiatry*. 2013;28.

143. M. Hasanovic, P. Izet, E. Avdibegovic, N. Kravic, L. Moro, T.  
Franciskovic, R. Gregurek, G. Tocilj. Training of bosnia-herzegovina mental  
health professionals in group analysis as the factor of development of culture of  
dialogue in the aftermath of the 1992-1995 war. *European Psychiatry*. 2013;28.

144. J.V. Diaz, P. Lister, J.R. Ortiz, N.K. Adhikari, N. Adhikari. Development of  
a severe influenza critical care curriculum and training materials for resource-  
limited settings. *Critical Care*. 2013;17:S184-S5.

145. F. Plani, E. Degiannis. Development of a hospital disaster plan and  
training exercises for chris hani baragwanath academic hospital and resource-  
limited countries. *Southern African Journal of Critical Care*. 2012;28(1):34-5.

146. E.K. Wurapa, D. Brett-Major, B. Lloyd, D. Punguyire, K. Kronmann, C.  
Duplisis, N. Tagoe. Establishing a tropical medicine training program for the us

1013 department of defense (DOD) in kintampo, ghana: Overcoming challenges.  
1014 American Journal of Tropical Medicine and Hygiene. 2012;87(5):238.  
1015 147. S. Chihanga, A. Tatarsky, T. Mosweunyane, M. Motlaleng, L. Bewlay, K.  
1016 Digovich, E. Mankhi, D. Kandula, N.J. Oumer, S. Muza, A. Akrem, J. Makuka.  
1017 Toward malaria elimination in Botswana: A pilot study to improve malaria  
1018 diagnosis and surveillance using mobile technology. Malaria Journal.  
1019 2012;11:S56-S7.  
1020 148. G. Garnett. Using south-south collaboration to strengthen midwifery skills  
1021 and competencies in South Sudan. International Journal of Gynecology and  
1022 Obstetrics. 2012;119:S190-S1.  
1023 149. P. Grosso. The role of the international anaesthetist in the professional  
1024 training and OT management of the anaesthesia nurses. 12 years of  
1025 experience of emergency Italian NGO in Afghanistan. British Journal of  
1026 Anaesthesia. 2012;108:ii262.  
1027 150. I. Norton. The power of immersion; Training health personnel for disaster  
1028 humanitarian responses. EMA - Emergency Medicine Australasia. 2012;24:8-9.  
1029 151. H.C. He, P. Chen, S.X. Liu, Z.J. Lei, Y.H. Yang, C.Q. He. The urgent  
1030 rehabilitation technique education program for Wenchuan earthquake victims.  
1031 Hong Kong Journal of Emergency Medicine. 2011;18(5):324-7.  
1032 152. R. Sadiwa. Addressing developmental delays among African children in  
1033 post-conflict areas: An E-health approach. Physiotherapy (United Kingdom).  
1034 2011;97:eS1590.  
1035 153. A.C.D.S.D. Oliveira, S. Scota, A.M. Costa E Silva, E.S.D. Abreu.  
1036 Experience in confronting the H1N1 epidemy. BMC Proceedings. 2011;5.

- 1037 154. J. Mbabazi. Phase 1 implementation of male circumcision as a  
1038 comprehensive package of HIV prevention in Rwanda. Sexually Transmitted  
1039 Infections. 2011;87:A319.
- 1040 155. D. Darby, D. Whiting, J. Winters. Multi-modal training for adult ICU  
1041 nurses caring for paediatric patients in a war zone. Intensive Care Medicine.  
1042 2011;37:S440-S1.
- 1043 156. R. Way, A.A. Bartlett, T. Wong, T. Myint, R. De Souza. A modality of  
1044 disaster response: Cyclone nargis and psychological first aid. Asian Journal of  
1045 Psychiatry. 2011;4:S19.
- 1046 157. M. Hasanovic, I. Pajevic, S. Morgan, N. Kravic. Emdr training for mental  
1047 health therapists in postwar bosniaherzegovina who work with psycho-  
1048 traumatized population for increasing their psychotherapy capacities. European  
1049 Psychiatry. 2011;26.
- 1050 158. O. Oleribe, F. Mosha, M. Mohammed, J. Mghamba, P. Mmbuji, P.  
1051 Nsubuga, D. Mukanga. From strategy to action: The vital roles of trained field  
1052 epidemiologists and laboratory management professionals in epidemic control  
1053 and prevention in Tanzania. International Journal of Infectious Diseases.  
1054 2010;14:e432.
- 1055 159. Y. Wondmikun, A. Feleke, M. Tafete. Successful coupling of community  
1056 attachment of health science students with relief work for drought victims.  
1057 Education for Health. 2005;18(2):179-93.
- 1058 160. M.R. AlOsta, I. Khalaf, Othman E.H. AO - AlOsta Mohammad R., ORCID:  
1059 <https://orcid.org/---> AO - Khalaf Inaam, ORCID: <https://orcid.org/---> AO - Othman  
1060 Elham H., <https://orcid.org/---> ORCID:. Jordanian nursing students' engagement

1061 and satisfaction with e-learning during COVID-19 pandemic. International  
1062 journal of nursing education scholarship. 2023;20(1).

1063 161. K. Conyers, A.B. Gillies, C. Sibley, C. McMullen, M.A. Remley, S.  
1064 Wence, J.M. Gurney. Where There's a War, There's a Way: A Brief Report on  
1065 Tactical Combat Casualty Care Training in a Multinational Environment. Journal  
1066 of special operations medicine : a peer reviewed journal for SOF medical  
1067 professionals. 2023.

1068 162. S.-H. Wang, G. Yimer, M. Bisesi, L. Lisawork, D. Sugerman, M. Alayu, M.  
1069 Wossen, S.A. Abayneh, T. Endashaw, H. Kubinson, T. Kanter, K. Gallagher, W.  
1070 Gebreyes. Rapid virtual training and field deployment for COVID-19 surveillance  
1071 officers: experiences from Ethiopia. Pan African Medical Journal. 2022;43:23.

1072 163. M.R. Suresh, K.K. Valdez-Delgado, A.M. Staudt, J.D. Trevino, W.N.  
1073 Papalski, D.J. Greydanus, K.J. Twilligear, E.A. Mann-Salinas, C.A. VanFosson.  
1074 Predeployment training of Army medics assigned to prehospital settings.  
1075 Journal of Trauma and Acute Care Surgery. 2021;91(2):S130-S8.

1076 164. O. Popova. EXPERIENCE IN ORGANIZING URGENT TRAINING FOR  
1077 GI PROFESSIONALS ON EMERGENCY CARE FOR ABDOMINAL INJURIES  
1078 DURING THE WAR IN UKRAINE. United European Gastroenterology Journal.  
1079 2022;10:1081-2.

1080 165. J. Beckmann, T. Wenzel, M. Hautzinger, J.I. Kizilhan. Training of  
1081 psychotherapists in post-conflict regions: A Community case study in the  
1082 Kurdistan Region of Iraq. Frontiers in Psychiatry. 2022;13:947903.

1083 166. D. Canavese, M. Polidoro. Massive Open Online Courses as Strategies  
1084 to Address Violence through the Training of Health and the Intersectoral

- 1085 Professionals in Brazil. *Journal of Aggression, Maltreatment and Trauma*.  
1086 2022;31(6):769-78.
- 1087 167. B. Han, F. Zang, J. Liu, S. Li, W. Zhang, Y. Zhang, Z. Li. Effect Analysis  
1088 of "Four-Step" Training and Assessment Tool in the Prevention and Control of  
1089 COVID-19. *Infection and Drug Resistance*. 2022;15:1247-57.
- 1090 168. A. Kamal Uddin, M. Gairola, M.A. Sumon, G.S. Wadhawan, J. Hosen, S.  
1091 Ghosh. Virtual Training on IGRT: A Unique Initiative of a Private Cancer Center  
1092 from a Developing Country with Regional Academic Collaboration during  
1093 COVID-19 Pandemic. *International Journal of Radiation Oncology Biology*  
1094 *Physics*. 2022;114(3):e493-e4.
- 1095 169. Z.Y. Wong, S. Goh. Better Surgical Ward Round: Replicating Near-Peer  
1096 Teaching (NPT) on a virtual international platform during the COVID-19  
1097 pandemic organized by the IASSS. *Surgical Endoscopy*. 2022;36(1):S159.
- 1098 170. K. Payne, L. Farrant, K. Nkhoma, R. Harding, L. Gwyther. The  
1099 Development and Evaluation of Online Home Palliative Training During COVID-  
1100 19 Pandemic in South Africa. *Palliative Medicine*. 2022;36(1):107.
- 1101 171. R. Kalayasiri, S. Wainipitapong. Training of psychiatry and mental health  
1102 in a low- and middle-income country: Experience from Thailand before and after  
1103 COVID-19 outbreak. *Asia-Pacific Psychiatry*. 2021;13(4):e12493.
- 1104 172. L.-N. Tang, M. Li, H.-D. Huang, Y. Quan, B. Li, W.-R. Jia, Y. Yang.  
1105 Combat casualty care training of Chinese peacekeeping military doctors: An  
1106 evaluation of effectiveness. *Academic Journal of Second Military Medical*  
1107 *University*. 2021;42(1):85-91.
- 1108 173. H. Groninger, K. Richardson, M. Doherty, A. Lynch-Godrei, T. Binta  
1109 Azad, L. Ferdous, R. Ara. Project echo™ palliative care: Impact of TELE-

1110 mentoring and teaching for healthcare providers working with rohingya refugees  
1111 in Bangladesh. Palliative Medicine. 2021;35(1):116.

1112 174. S.S. Thakre, A. Shok rupraoji jadhao, M.A. Shwinkumar dhoble, R. Dass,  
1113 S.B. Thakre, A. Somani. Evaluation of effectiveness of Covid-19 training and  
1114 assessment of anxiety among nurses of a tertiary health care center during the  
1115 Corona Virus pandemic-an experimental study. Journal of Clinical and  
1116 Diagnostic Research. 2020;14(11):34-7.

1117 175. P. Rishipathak, M. Bhandari, A. Hinduja. Assessing the effectiveness of  
1118 online teaching methodology among emergency medical professionals in Pune,  
1119 India. Indian Journal of Forensic Medicine and Toxicology. 2020;14(4):3697-  
1120 703.

1121 176. S. Khoja, R. Scott, N. Husyin, H. Durrani, M. Arif, F. Faqiri, E. Hedayat,  
1122 W. Yousufzai. Impact of simple conventional and Telehealth solutions on  
1123 improving mental health in Afghanistan. Journal of telemedicine and telecare.  
1124 2016;22(8):495-8.

1125 177. JA Malik, S Musharraf, R Safdar, M Iqbal. Myths and misconception of  
1126 COVID-19 among hospital sanitary workers in Pakistan: Efficacy of a training  
1127 program intervention. BMC health services research. 2022;22(1):818.

1128 178. VO Osula, JE Sanders, T Chakare, L Mapota-Masoabi, M Ranyali-  
1129 Otubanjo, B Hansoti, ED McCollum. COVID-19 advanced respiratory care  
1130 educational training programme for healthcare workers in Lesotho: an  
1131 observational study. BMJ open. 2022;12(4):e058643.

1132 179. SA Müller, AOK Diallo, R Wood, M Bayo, T Eckmanns, O Tounkara, M  
1133 Arvand, M Diallo, M Borchert. Implementation of the WHO hand hygiene



- 1134 strategy in Faranah regional hospital, Guinea. Antimicrobial resistance and  
1135 infection control. 2020;9(1):65.
- 1136 180. W Eardley, D Bowley, P Hunt, J Round, N Tarmey, A Williams. Education  
1137 and Ebola: initiating the cascade of emergency healthcare training. Journal of  
1138 the Royal Army Medical Corps. 2016;162(3):203-6.
- 1139 181. Z Chemali, CPC Borba, K Johnson, RS Hock, L Parnarouskis, DC  
1140 Henderson, GL Fricchione. Humanitarian space and well-being: effectiveness of  
1141 training on a psychosocial intervention for host community-refugee interaction.  
1142 Medicine, conflict, and survival. 2017;33(2):141-61.
- 1143 182. HM Soeters, L Koivogui, L de Beer, CY Johnson, D Diaby, A Ouedraogo,  
1144 F Touré, FO Bangoura, MA Chang, N Chea, EM Dotson, A Finlay, D Fitter, MJ  
1145 Hamel, C Hazim, M Larzelere, BJ Park, AK Rowe, AM Thompson-Paul, A  
1146 Twyman, et al. Infection prevention and control training and capacity building  
1147 during the Ebola epidemic in Guinea. PloS one. 2018;13(2):e0193291.
- 1148 183. SS Naghavi Alhosseini, A Pourabbasi. Earthquake in the city: using real  
1149 life gamification model for teaching professional commitment in high school  
1150 students. Journal of medical ethics and history of medicine. 2018;11:12.
- 1151 184. S Dababnah, S Habayeb, BJ Bear, D Hussein. Feasibility of a trauma-  
1152 informed parent-teacher cooperative training program for Syrian refugee  
1153 children with autism. Autism : the international journal of research and practice.  
1154 2019;23(5):1300-10.
- 1155 185. M Hawkes, JP Katsuva, CK Masumbuko. Use and limitations of malaria  
1156 rapid diagnostic testing by community health workers in war-torn Democratic  
1157 Republic of Congo. Malaria journal. 2009;8:308.

- 1158 186. JJ Thomas, C H, P Kulkarni, P B, NM M R. Participatory Workshop-  
1159 Based Intervention for Better Preparedness and Awareness About Disaster  
1160 Management Among Accredited Social Health Activists in India: A Brief Report.  
1161 Disaster medicine and public health preparedness. 2022;16(1):33-5.
- 1162 187. U Patel, JR Pharr, C Ihesiaba, FU Oduenyi, AT Hunt, D Patel, M  
1163 Obiefune, N Chukwumerije, EE Ezeanolue. Ebola Outbreak in Nigeria:  
1164 Increasing Ebola Knowledge of Volunteer Health Advisors. Global journal of  
1165 health science. 2015;8(1):72-8.
- 1166 188. A Çiçek, M Çetin. Combat medic course: evaluation of trainees'  
1167 perception of learning and academic-self perception. BMJ military health.  
1168 2020;166:e63-e5.
- 1169 189. PD Sonenthal, C Kachimanga, D Komba, M Bangura, N Ludmer, M  
1170 Lado, M Patino, RB Gerrard, MJ Vandy, RH Marsh, J Mukherjee, SA Rouhani.  
1171 Applying the WHO-ICRC BEC course to train emergency and inpatient  
1172 healthcare workers in Sierra Leone early in the COVID-19 outbreak. BMC  
1173 health services research. 2022;22(1):197.
- 1174 190. R de Moraes Pinto, RA de Medeiros Valentim, L Fernandes da Silva, T  
1175 Góis Farias de Moura Santos Lima, V Kumar, CA Pereira de Oliveira, C Martins  
1176 Gomes de Gusmão, JC de Paiva, I de Andrade. Analyzing the reach of public  
1177 health campaigns based on multidimensional aspects: the case of the syphilis  
1178 epidemic in Brazil. BMC public health. 2021;21(1):1632.
- 1179 191. M Zhou, F Yuan, X Zhao, F Xi, X Wen, L Zeng, W Zeng, H Wu, H Zeng,  
1180 Z Zhao. Research on the individualized short-term training model of nurses in  
1181 emergency isolation wards during the outbreak of COVID-19. Nursing open.  
1182 2020;7(6):1902-8.

- 1183 192. S Gul, H Ghaffar, S Mirza, S Fizza Tauqir, F Murad, Q Ali, A Zafar Malik,  
1184 RC Merrell. Multitasking a telemedicine training unit in earthquake disaster  
1185 response: paraplegic rehabilitation assessment. *Telemedicine journal and e-*  
1186 *health* : the official journal of the American Telemedicine Association.  
1187 2008;14(3):280-3.
- 1188 193. DA Kuhls, PJ Chestovich, P Coule, DM Carrison, CM Chua, N Wora-  
1189 Urai, T Kanchanarin. Basic Disaster Life Support (BDLS) Training Improves  
1190 First Responder Confidence to Face Mass-Casualty Incidents in Thailand.  
1191 *Prehospital and disaster medicine*. 2017;32(5):492-500.
- 1192 194. T Najafi Ghezeli, J Mohammad Aliha, H Haghani, N Javadi. Effect of  
1193 education using the virtual social network on the knowledge and attitude of  
1194 emergency nurses of disaster preparedness: A quasi-experiment study. *Nurse*  
1195 *education today*. 2019;73:88-93.
- 1196 195. M Bodas, K Peleg, B Adini, L Ragazzoni. Training Package for  
1197 Emergency Medical Teams Deployed to Disaster Stricken Areas: Has 'TEAMS'  
1198 Achieved its Goals? *Disaster medicine and public health preparedness*.  
1199 2022;16(2):663-9.
- 1200 196. ZY Wang, LJ Zhang, YH Liu, WX Jiang, JY Jia, SL Tang, XY Liu. The  
1201 effectiveness of E-learning in continuing medical education for tuberculosis  
1202 health workers: a quasi-experiment from China. *Infectious diseases of poverty*.  
1203 2021;10(1):72.
- 1204 197. A Djalali, V Hosseini, A Hasani, K Shirmardi, M Castrén, G Ohlén, F  
1205 Panahi. A fundamental, national, medical disaster management plan: an  
1206 education-based model. *Prehospital and disaster medicine*. 2009;24(6):565-9.

- 1207 198. C Carlos, R Capistrano, CF Tobora, MR delos Reyes, S Lupisan, A  
1208 Corpuz, C Aumentado, LL Suy, J Hall, J Donald, M Counahan, MS Curless, W  
1209 Rhymer, M Gavin, C Lynch, MA Black, AD Anduyon, P Buttner, R Speare.  
1210 Hospital preparedness for Ebola virus disease: a training course in the  
1211 Philippines. Western Pacific surveillance and response journal : WPSAR.  
1212 2015;6(1):33-43.
- 1213 199. C Welton-Mitchell, LE James, SN Khanal, AS James. An integrated  
1214 approach to mental health and disaster preparedness: a cluster comparison  
1215 with earthquake affected communities in Nepal. BMC psychiatry.  
1216 2018;18(1):296.
- 1217 200. C Wang, H Xiang, Y Xu, D Hu, W Zhang, J Lu, L Sun, S Nie. Improving  
1218 emergency preparedness capability of rural public health personnel in China.  
1219 Public health. 2010;124(6):339-44.
- 1220 201. WE Rosa, V Karanja, JDN Kpoeh, C McMahon, J Booth. A Virtual  
1221 Coaching Workshop for a Nurse-Led Community-Based Palliative Care Team in  
1222 Liberia, West Africa, to Promote Staff Well-Being During COVID-19. Nursing  
1223 education perspectives. 2021;42(6):E194-E6.
- 1224 202. N Chamane, R Ebenezer Ogunsakin, TP Mashamba-Thompson. The  
1225 effect of a mobile-learning curriculum on improving compliance to quality  
1226 management guidelines for HIV rapid testing services in rural primary  
1227 healthcare clinics, KwaZulu-Natal, South Africa: a quasi-experimental study.  
1228 BMC health services research. 2022;22(1):624.
- 1229 203. C Hébert, C Dagenais, E Mc Sween-Cadieux, V Ridde. Video as a public  
1230 health knowledge transfer tool in Burkina Faso: A mixed evaluation comparing  
1231 three narrative genres. United States2020 2020-6. e0008305 p.

1232 204. R Sharara-Chami, R Sabouneh, R Zeineddine, R Banat, J Fayad, Z  
1233 Lakissian. In Situ Simulation: An Essential Tool for Safe Preparedness for the  
1234 COVID-19 Pandemic. *Simulation in healthcare : journal of the Society for*  
1235 *Simulation in Healthcare*. 2020;15(5):303-9.

1236 205. MM El-Bahnasawy, NA Labib, MA Abdel-Fattah, AM Ibrahim, TA Morsy.  
1237 Selected infectious disease disasters for nursing staff training at Egyptian  
1238 Eastern Border. *Journal of the Egyptian Society of Parasitology*. 2014;44(1):41-  
1239 54.

1240 206. JJ Leow, SI Brundage, AL Kushner, TB Kamara, E Hanciles, A Muana,  
1241 MM Kamara, KS Daoh, TP Kingham. Mass casualty incident training in a  
1242 resource-limited environment. *The British journal of surgery*. 2012;99(3):356-61.

1243 207. A Otu, B Ebenso, O Okuzu, E Osifo-Dawodu. Using a mHealth tutorial  
1244 application to change knowledge and attitude of frontline health workers to  
1245 Ebola virus disease in Nigeria: a before-and-after study. *Human resources for*  
1246 *health*. 2016;14:5.

1247 208. A Findyartini, N Greviana, C Hanum, JM Husin, NC Sudarsono, DGB  
1248 Krisnamurti, P Rahadiani. Supporting newly graduated medical doctors in  
1249 managing COVID-19: An evaluation of a Massive Open Online Course in a  
1250 limited-resource setting. *PloS one*. 2021;16(9):e0257039.

1251 209. J Sullivan, A Al-Marri, E Almomani, J Mathias. The Impact of Simulation-  
1252 Based Education on Nurses' Perceived Predeployment Anxiety During the  
1253 COVID-19 Pandemic Within the Cultural Context of a Middle Eastern Country.  
1254 *Journal of medical education and curricular development*.  
1255 2021;8:23821205211061012.

- 1256 210. C Ng, H Ma, B Raphael, X Yu, J Fraser, D Tang. China-Australia training  
1257 on psychosocial crisis intervention: response to the earthquake disaster in  
1258 Sichuan. Australasian psychiatry : bulletin of Royal Australian and New Zealand  
1259 College of Psychiatrists. 2009;17(1):51-5.
- 1260 211. JA Khan, MRB Kiani. Impact of multi-professional simulation-based  
1261 training on perceptions of safety and preparedness among health workers  
1262 caring for coronavirus disease 2019 patients in Pakistan. Korea (South)2020  
1263 2020. 19 p.
- 1264 212. MJ Jordans, NP Luitel, B Poudyal, WA Tol, IH Komproe. Evaluation of a  
1265 brief training on mental health and psychosocial support in emergencies: a pre-  
1266 and post-assessment in Nepal. Prehospital and disaster medicine.  
1267 2012;27(3):235-8.
- 1268 213. N Bajow, S Alkhalil, N Maghraby, S Alesa, AA Najjar, S Aloraifi.  
1269 Assessment of the effectiveness of a course in major chemical incidents for  
1270 front line health care providers: a pilot study from Saudi Arabia. BMC medical  
1271 education. 2022;22(1):350.
- 1272 214. C Salita, R Liwanag, RE Tiongco, R Kawano. Development,  
1273 implementation, and evaluation of a lay responder disaster training package  
1274 among school teachers in Angeles City, Philippines: using Witte's behavioral  
1275 model. Public health. 2019;170:23-31.
- 1276 215. RV Tauxe, M Lynch, Y Lambert, J Sobel, JW Dimerçant, A Khan. Rapid  
1277 development and use of a nationwide training program for cholera  
1278 management, Haiti, 2010. Emerging infectious diseases. 2011;17(11):2094-8.

- 1279 216. SM Pang, SS Chan, Y Cheng. Pilot training program for developing  
1280 disaster nursing competencies among undergraduate students in China.  
1281 Nursing & health sciences. 2009;11(4):367-73.
- 1282 217. S Alim, M Kawabata, M Nakazawa. Evaluation of disaster preparedness  
1283 training and disaster drill for nursing students. Nurse education today.  
1284 2015;35(1):25-31.
- 1285 218. L Cooper, H Guan, KM Ventre, Y Dai, Z Zhu, S Li, S Berman. Evaluating  
1286 the efficacy of the AAP "pediatrics in disaster" course: the Chinese experience.  
1287 United States2012 2012. 231-41 p.
- 1288 219. TF Chiu, D Chu, SJ Huang, M Chang, Y Liu, JJ Lee. Facing the  
1289 Coronavirus Pandemic: An Integrated Continuing Education Program in Taiwan.  
1290 International journal of environmental research and public health. 2021;18(5).
- 1291 220. K Haar, A El-Khani, V Molgaard, W Maalouf. Strong families: a new  
1292 family skills training programme for challenged and humanitarian settings: a  
1293 single-arm intervention tested in Afghanistan. BMC public health.  
1294 2020;20(1):634.
- 1295 221. D Shi, H Lu, H Wang, S Bao, L Qian, X Dong, K Tao, Z Xu. A simulation  
1296 training course for family medicine residents in China managing COVID-19.  
1297 Australian journal of general practice. 2020;49(6):364-8.
- 1298 222. L Sun. Intervention Effect of Time Management Training on Nurses'  
1299 Mental Health during the COVID-19 Epidemic. Psychiatria Danubina.  
1300 2021;33(4):626-33.
- 1301 223. NA Bajow, YI Alawad, SM Aloraifi. A Basic Course in Humanitarian  
1302 Health Emergency and Relief: A Pilot Study from Saudi Arabia. Prehospital and  
1303 disaster medicine. 2019;34(6):580-7.

- 1304 224. SS Chan, WS Chan, Y Cheng, OW Fung, TK Lai, AW Leung, KL Leung,  
1305 S Li, AL Yip, SM Pang. Development and evaluation of an undergraduate  
1306 training course for developing International Council of Nurses disaster nursing  
1307 competencies in China. United States2010 2010-12. 405-13 p.
- 1308 225. H Rehman, M Ghani, M Rehman. Effectiveness of basic training session  
1309 regarding the awareness of Ebola virus disease among nurses of public tertiary  
1310 care hospitals of Lahore. JPMA The Journal of the Pakistan Medical  
1311 Association. 2020;70(3):477-81.
- 1312 226. DA Díaz-Guio, A Ricardo-Zapata, J Ospina-Velez, G Gómez-Candamil,  
1313 S Mora-Martinez, AJ Rodriguez-Morales. Cognitive load and performance of  
1314 health care professionals in donning and doffing PPE before and after a  
1315 simulation-based educational intervention and its implications during the  
1316 COVID-19 pandemic for biosafety. Le infezioni in medicina. 2020;28:111-7.
- 1317 227. W Tan, Y Ye, Y Yang, Z Chen, X Yang, C Zhu, D Chen, J Tan, C Zhen.  
1318 Whole-Process Emergency Training of Personal Protective Equipment Helps  
1319 Healthcare Workers Against COVID-19: Design and Effect. Journal of  
1320 occupational and environmental medicine. 2020;62(6):420-3.
- 1321 228. D Wang, D Operario, Q Hong, H Zhang, TJ Coates. Intervention to train  
1322 physicians in rural China on HIV/STI knowledge and risk reduction counseling:  
1323 preliminary findings. AIDS care. 2009;21(4):468-72.
- 1324 229. MM El-Bahnasawy, LA Megahed, HA Saleh, MA Abdelfattah, TA Morsy.  
1325 TRAINING PROGRAM FOR NURSING STAFF REGARDING VIRAL  
1326 HEMORRHAGIC FEVERS IN A MILITARY HOSPITAL. Journal of the Egyptian  
1327 Society of Parasitology. 2015;45(2):249-72.



- 1328 230. S Khari, M Pazokian, A Salimi Akin Abadi, M Zarmehrparirouy, Y  
1329 Ahmadvand. The Effect of E-Learning Program for COVID-19 Patient Care on  
1330 the Knowledge of Nursing Students: A Quasi-Experimental Study. SAGE open  
1331 nursing. 2022;8:23779608221124421.
- 1332 231. A Otu, O Okuzu, E Effa, B Ebenso, S Ameh, N Nihalani, O Onwusaka, T  
1333 Tawose, A Olayinka, J Walley. Training health workers at scale in Nigeria to  
1334 fight COVID-19 using the InStrat COVID-19 tutorial app: an e-health  
1335 interventional study. Therapeutic advances in infectious disease.  
1336 2021;8:20499361211040704.
- 1337 232. P Jackson, T Siddharthan, IT Cordoba Torres, BA Green, CJ Policard, J  
1338 Degraff, R Padalkar, KB Logothetis, JA Gold, AC Fort. Developing and  
1339 Implementing Noninvasive Ventilator Training in Haiti during the COVID-19  
1340 Pandemic. ATS scholar. 2022;3(1):112-24.
- 1341 233. R Sharma, A Mohanty, V Singh, VA S, PK Gupta, P Jelly, P Gupta, S  
1342 Rao. Effectiveness of Video-Based Online Training for Health Care Workers to  
1343 Prevent COVID-19 Infection: An Experience at a Tertiary Care Level Institute,  
1344 Uttarakhand, India. Cureus. 2021;13(5):e14785.
- 1345 234. K Scott, G Sibeko, B Cummings, B Myers, K Sorsdahl, DJ Stein, C Kuo,  
1346 SJ Becker. Training the Addiction Treatment Workforce in HIV Endemic  
1347 Regions: An Overview of the South Africa HIV Addiction Technology Transfer  
1348 Center Initiative. Training and education in professional psychology.  
1349 2020;14(1):78-85.
- 1350 235. M V Babu, MK Arumugam, DJ Debnath. Simulated Patient Environment:  
1351 A Training Tool for Healthcare Professionals in COVID-19 Era. Advances in  
1352 medical education and practice. 2021;12:579-85.

- 1353 236. J Liu, Y Huang, B Li, L Gui, L Zhou. Development and Evaluation of  
1354 Innovative and Practical Table-top Exercises Based on a Real Mass-Casualty  
1355 Incident. *Disaster medicine and public health preparedness*. 2022;1-6.
- 1356 237. S Galagan, S Jed, J Sumitani, JM Gilvydis, A Bakor, R Cooke, E Naidoo,  
1357 D Winters, MR Weaver. Improving Tuberculosis (TB) and Human  
1358 Immunodeficiency Virus (HIV) Treatment Monitoring in South Africa: Evaluation  
1359 of an Advanced TB/HIV Course for Healthcare Workers. *Open forum infectious  
1360 diseases*. 2017;4(1):ofw248.
- 1361 238. MEB Arnold, NA Leitzelar. Bridging the Gap Between Emergency  
1362 Response and Health Systems Strengthening: The Role of Improvement Teams  
1363 in Integrating Zika Counseling in Family Planning Services in Honduras. *Cham  
1364 (CH)2020* 2020. 59-75 p.
- 1365 239. P Kulshreshtha, Y Bahurupi, M Dhar, S Sharma, R Kathrotia, S Rao, M  
1366 Naithani, M Gupta. Preparedness of Undergraduate Medical Students to  
1367 Combat COVID-19: A Tertiary Care Experience on the Effectiveness and  
1368 Efficiency of a Training Program and Future Prospects. *Cureus*.  
1369 2022;14(3):e22971.
- 1370 240. Y Ye, P Shi, Y Gui, AM Li, G Huang, H Xu, Q Lu, J Hong, Y Gu, X Hu, G  
1371 Liu, C Wang, Q Huang, X Zhang. Point-of-care training program on COVID-19  
1372 infection prevention and control for pediatric healthcare workers: a multicenter,  
1373 cross-sectional questionnaire survey in Shanghai, China. *Translational  
1374 pediatrics*. 2021;10(1):44-53.
- 1375 241. S Bhattacharya, A Singh, J Semwal, RR Marzo, N Sharma, M Goyal, S  
1376 Vyas, A Srivastava. Impact of a training program on disaster preparedness  
1377 among paramedic students of a tertiary care hospital of North India: A single-

1378 group, before-after intervention study. Journal of education and health  
1379 promotion. 2020;9:5.

1380 242. AS Wong, EM Marwali, G Maclaren, M Ogino, J Fraser, PL Chi Keung, L  
1381 Fitria, P Adriane, SW Sin. ECMO simulation training during a worldwide  
1382 pandemic: The role of ECMO telesimulation. Perfusion.  
1383 2022;2676591221093868.

1384 243. M Khoshnudi, F Ghadamgahi, G Najjarzade, FH Mud, N Aghaei, N Arab,  
1385 SJ Hosseini-Shokouh, A Nikbakht. Comparison of the effect of bioterrorism  
1386 education through two methods of lecture and booklet on the knowledge and  
1387 attitude of nurses of Shams Al-Shomus Nezaja Hospital. Journal of education  
1388 and health promotion. 2022;11:192.

1389 244. OT Bankole, G Abbass, TA Obembe, IO Ajayi. KNOWLEDGE OF  
1390 HEALTH WORKERS ON CHOLERA MANAGEMENT IN OYO STATE:  
1391 RESULTS OF A TRAINING INTERVENTION. Annals of Ibadan postgraduate  
1392 medicine. 2021;19(2):103-11.

1393 245. L. Guerrero-Torres, I. Nunez-Saavedra, Y. Caro-Vega, B. Crabtree-  
1394 Ramirez. Impact of Training Residents to Improve HIV Screening in a Teaching  
1395 Hospital in Mexico City. Open Forum Infectious Diseases. 2020;7:S590.

1396 246. A. Sena, F. Forde, M. Masters. Disaster preparedness training in  
1397 emergency medicine residents using a tabletop exercise. Western Journal of  
1398 Emergency Medicine. 2020;21(4):S39-S40.

1399 247. D. Peters, N. Stucke, F. Mattner. Development and pilot testing of an  
1400 infection prevention and control (IPC) tool for humanitarian response to  
1401 outbreaks and natural disasters. Antimicrobial Resistance and Infection Control.  
1402 2019;8.

- 1403 248. M.D. Bruning. The kid next door-raising awareness of Civilian health care  
1404 providers to the needs of military children-a tactical approach to education.  
1405 Pediatrics. 2018;141(1).
- 1406 249. A.E. Nwandu, T. Madubuko, E. Onu, D. Olutola, K. Nike, U. Okonkwo, J.  
1407 Ilozumba, J. Egharevba, A. Ehoche, J. Apata. Sustainable pepfar funded in  
1408 service HIV training delivery models: A training impact evaluation from nigeria.  
1409 Annals of Global Health. 2017;83(1):123.
- 1410 250. J. Ali, R. Adam, H. Ondiveeran, H. Bedaysie, E. Ali, A. Sorvari, S. Briggs.  
1411 Applicability of the advanced disaster medical response (ADMR) course,  
1412 Trinidad and Tobago. CMAJ Canadian Medical Association Journal.  
1413 2015;58(2):S3-S4.
- 1414 251. M. Reynolds, J. Malekani, I. Damon, B. Monroe, J. Kabamba, R. Shongo  
1415 Lushima, B. Nguete, S. Karhemere, E. Pukuta, D. Tack, A. McCollum, J. Bass,  
1416 O. Wemakoy. Training health workers for enhanced monkeypox surveillance,  
1417 Democratic Republic of the Congo. International Journal of Infectious Diseases.  
1418 2014;21:274-5.
- 1419 252. R. Asgary, K. Jacobson. Comprehensive on-site medical and public  
1420 health training for local medical practitioners in a refugee setting. Disaster  
1421 Medicine and Public Health Preparedness. 2013;7(1):82-8.
- 1422 253. D. Kuhls, P. Coule, D. Carrison, C. Chua, C. Heath, N. Wora-Urai, T.  
1423 Kanchanarin, J. Fildes. International disaster training: Advanced disaster life  
1424 support (ADLS) improves Thai physician and nurse confidence to respond to  
1425 mass casualty disasters. Critical Care Medicine. 2009;37(12):A284.
- 1426 254. R.D.S.G. Severini, M. Marcovici, S.C.L. Farhat, D. Bivanco-Lima, T.B.  
1427 Couto, A.C. Amarante, K.R. Rodrigues, D.S.N.B. Ghosn, Schvartsman C. AO -

1428 Severini Rafael da Silva Giannasi, ORCID: <https://orcid.org/---533X> AO -  
1429 Marcovici Michelle, ORCID: <https://orcid.org/---> AO - Farhat Sylvia Costa Lima,  
1430 ORCID: <https://orcid.org/---> AO - Couto Thomaz Bittencourt, ORCID:  
1431 <https://orcid.org/---981X> AO - Amarante Ana Carolina, ORCID: <https://orcid.org/->  
1432 <https://orcid.org/---> AO - Rodrigues Katharina Reichmann, ORCID: <https://orcid.org/---> AO -  
1433 Ghosn Danielle Saad Nemer Bou, ORCID: <https://orcid.org/---> AO -  
1434 Schvartsman Claudio, ORCID: <https://orcid.org/---> AO - Bivanco-Lima Danielle,  
1435 <https://orcid.org/---> ORCID:. How to incorporate telemedicine in medical  
1436 residency: A Brazilian experience in pediatric emergency. Clinics.  
1437 2023;78:100162.  
1438 255. H. Farhat, J. Laughton, A. Joseph, W. Abougalala, M. Ben Dhiab, G.  
1439 Alinier. The educational outcomes of an online pilot workshop in CBRNe  
1440 emergencies. Journal of Emergency Medicine, Trauma and Acute Care.  
1441 2022;2022(5):38.  
1442 256. R. Mitchell, S. Bornstein, D. Piamnok, W. Sebby, C. Kingston, R. Tefatu,  
1443 M. Kendino, B. Josaiah, J. Pole, S. Kuk, S. Korver, J.-P. Miller, T. Cole, A. Erbs,  
1444 G. O'Reilly, P. Cameron, D. Sengiromo, Banks C. AO - Mitchell Rob,  
1445 <https://orcid.org/---> ORCID:. Multimodal learning for emergency department  
1446 triage implementation: experiences from Papua New Guinea during the COVID-  
1447 19 pandemic. The Lancet Regional Health - Western Pacific. 2023;33:100683.  
1448 257. M. Susanti, L. Febrianti, R. Emrita, H. Hilmawati, W. Wahyudi, S.  
1449 Syafrida. The Effect of Caring Training on the Implementation of Caring  
1450 Behavior and Work Culture of Nurses in Providing Services to COVID-19  
1451 Patients in an Indonesia's National Referral Hospital. Open Access Macedonian  
1452 Journal of Medical Sciences. 2022;10:655-61.

1453 258. D. Wood, F. Sulliman, G. Campello, A. Busse. Evaluation of virtual online  
1454 delivery of United Nations Office on Drugs and Crime (UNODC) national  
1455 training on novel psychoactive substances (NPS) to healthcare professionals in  
1456 Mauritius and the Seychelles during the COVID-19 pandemic. *Clinical*  
1457 *Toxicology*. 2022;60:48.

1458 259. S.S. Siddiqui, S. Saran, S. Saxena, S. Agrawal, S.N. Muzaffar, A.  
1459 Ahmed, A. Lohiya, A. Agrawal. The impact of a "one day basic intensive care  
1460 training program" on knowledge of non-intensivists during the COVID-19  
1461 pandemic. *Intensive Care Medicine Experimental*. 2021;9.

1462 260. R. Kharel, H. Vaishnav, N. Chillara, A. Elbenni, J. Baird, T. Kenyon, V.  
1463 Uzevski, A.C. Levine, A.R. Aluisio. Impact of a virtual COVID-19 trainer of  
1464 trainers program implemented via an academic-humanitarian collaboration.  
1465 *Academic Emergency Medicine*. 2021;28:S367.

1466 261. Z Zerdo, S Anthierens, JP Van Geertruyden, F Massebo, G Biresaw, M  
1467 Shewangizaw, G Endashaw, A Tunje, M Masne, H Bastiaens. Implementation  
1468 of a malaria prevention education intervention in Southern Ethiopia: a  
1469 qualitative evaluation. *BMC public health*. 2022;22(1):1811.

1470 262. Y Van Heng, C Davoung, H Husum. Non-doctors as trauma surgeons? A  
1471 controlled study of trauma training for non-graduate surgeons in rural  
1472 Cambodia. *Prehospital and disaster medicine*. 2008;23(6):483-9; discussion 90-  
1473 1.

1474 263. X Wang, Y Zhou, Z Song, Y Wang, X Chen, D Zhang. Practical COVID-  
1475 19 Prevention Training for Obstetrics and Gynecology Residents Based on the  
1476 Conceive-Design-Implement-Operate Framework. *Frontiers in public health*.  
1477 2022;10:808084.

- 1478 264. T Martinez, S Duron, JV Schaal, Y Baudoin, O Barbier, JL Daban, M  
1479 Boutonnet, S Ausset, P Pasquier. Tourniquet Training Program Assessed by a  
1480 New Performance Score. Prehospital and disaster medicine. 2018;33(5):519-  
1481 25.
- 1482 265. SR Jafree, R Zakar, N Rafiq, A Javed, RR Durrani, SK Burhan, SM  
1483 Hasnain Nadir, F Ali, A Shahid, AU Momina, KJ Wrona, QK Mahmood, F  
1484 Fischer. WhatsApp-Delivered Intervention for Continued Learning for Nurses in  
1485 Pakistan During the COVID-19 Pandemic: Results of a Randomized-Controlled  
1486 Trial. Frontiers in public health. 2022;10:739761.
- 1487 266. R Xia, S Li, B Chen, Q Jin, Z Zhang. Evaluating the effectiveness of a  
1488 disaster preparedness nursing education program in Chengdu, China. Public  
1489 health nursing (Boston, Mass). 2020;37(2):287-94.
- 1490 267. PH Lee, B Fu, W Cai, J Chen, Z Yuan, L Zhang, X Ying. The  
1491 effectiveness of an on-line training program for improving knowledge of fire  
1492 prevention and evacuation of healthcare workers: A randomized controlled trial.  
1493 PloS one. 2018;13(7):e0199747.
- 1494 268. N Sommerland, C Masquillier, A Rau, M Engelbrecht, G Kigozi, T  
1495 Pliakas, A Janse van Rensburg, E Wouters. Reducing HIV- and TB-Stigma  
1496 among healthcare co-workers in South Africa: Results of a cluster randomised  
1497 trial. Social science & medicine (1982). 2020;266:113450.
- 1498 269. LE James, C Welton-Mitchell, JR Noel, AS James. Integrating mental  
1499 health and disaster preparedness in intervention: a randomized controlled trial  
1500 with earthquake and flood-affected communities in Haiti. Psychological  
1501 medicine. 2020;50(2):342-52.

- 1502 270. H Aghababaeian, S Sedaghat, N Tahery, AS Moghaddam, M Maniei, N  
1503 Bahrami, LA Ahvazi. A comparative study of the effect of triage training by role-  
1504 playing and educational video on the knowledge and performance of  
1505 emergency medical service staffs in Iran. United States2013 2013-12. 605-9 p.
- 1506 271. F Abbas, B Sawaf, I Hanafi, MY Hajeer, MI Zakaria, W Abbas, F  
1507 Alabdeh, N Ibrahim. Peers versus professional training of basic life support in  
1508 Syria: a randomized controlled trial. BMC medical education. 2018;18(1):142.
- 1509 272. D Zhang, H Liao, Y Jia, W Yang, P He, D Wang, Y Chen, W Yang, YP  
1510 Zhang. Effect of virtual reality simulation training on the response capability of  
1511 public health emergency reserve nurses in China: a quasiexperimental study.  
1512 BMJ open. 2021;11(9):e048611.
- 1513 273. D Operario, D Wang, ND Zaller, MF Yang, K Blaney, J Cheng, Q Hong,  
1514 H Zhang, J Chai, G Szekeres, J Galea, TJ Coates. Effect of a knowledge-based  
1515 and skills-based programme for physicians on risk of sexually transmitted  
1516 reinfections among high-risk patients in China: a cluster randomised trial. The  
1517 Lancet Global health. 2016;4(1):e29-36.
- 1518 274. D Ma, Y Shi, G Zhang, J Zhang. Does theme game-based teaching  
1519 promote better learning about disaster nursing than scenario simulation: A  
1520 randomized controlled trial. Nurse education today. 2021;103:104923.
- 1521 275. B Koca, G Arkan. The effect of the disaster management training  
1522 program among nursing students. Public health nursing (Boston, Mass).  
1523 2020;37(5):769-77.
- 1524 276. A El-Khani, K Cartwright, W Maalouf, K Haar, N Zehra, G Çokamay-  
1525 Yılmaz, R Calam. Enhancing Teaching Recovery Techniques (TRT) with  
1526 Parenting Skills: RCT of TRT + Parenting with Trauma-Affected Syrian



1527 Refugees in Lebanon Utilising Remote Training with Implications for Insecure  
1528 Contexts and COVID-19. *International journal of environmental research and*  
1529 *public health*. 2021;18(16).

1530 277. M. Toda, I. Njeru, D. Zurovac, S. O-Tipo, D. Kareko, M. Mwau, K. Morita.  
1531 The impact of a SMS-based disease outbreak alert system (mSOS) in Kenya.  
1532 *International Journal of Infectious Diseases*. 2016;45:247.

1533 278. E. van der Walt, R.S. Summers. The effect of a CPD training  
1534 (educational) intervention on the level of HIV knowledge of pharmacists.  
1535 *Pharmacy Education*. 2006;6(3):169-77.

1536 279. K. Peltzer, N. Mngqundaniso, G. Petros. A controlled study of an  
1537 HIV/AIDS/STI/TB intervention with traditional healers in KwaZulu-Natal, South  
1538 Africa. *AIDS and Behavior*. 2006;10(6):683-90.

1539 280. Y Yilmaz, O Sarikaya, Y Senol, Z Baykan, O Karaca, N Demiral Yilmaz, L  
1540 Altintas, A Onan, İ Sayek. RE-AIMing COVID-19 online learning for medical  
1541 students: a massive open online course evaluation. *BMC medical education*.  
1542 2021;21(1):303.

1543 281. U Alshiekhly, R Arrar, I Barnkggei, M Dashash. Facebook as a learning  
1544 environment for teaching medical emergencies in dental practice. *Education for*  
1545 *health (Abingdon, England)*. 2015;28(3):176-80.

1546 282. SS Singh, LB Singh. Training community health workers for the COVID-  
1547 19 response, India. *Bulletin of the World Health Organization*. 2022;100(2):108-  
1548 14.

1549 283. R Panda, N Mishra, S Lahoti, RR Prabhu, A Mishra, K Singh, K Rai.  
1550 Evaluation of COVID-19 ECHO training program for healthcare workers in India  
1551 - A Mixed-Method Study. *BMC health services research*. 2022;22(1):883.

- 1552 284. MD Tegegne, BF Endehabtu, J Klein, MK Gullslett, TM Yilma. Use of  
1553 social media for COVID-19-related information and associated factors among  
1554 health professionals in Northwest Ethiopia: A cross-sectional study. Digital  
1555 health. 2022;8:20552076221113394.
- 1556 285. M Stander, LA Wallis, WP Smith. Hospital disaster planning in the  
1557 Western cape, South Africa. Prehospital and disaster medicine. 2011;26(4):283-  
1558 8.
- 1559 286. M Feldman, V Lacey Krylova, P Farrow, L Donovan, E Zandamela, J  
1560 Rebelo, M Rodrigues, A Bulo, C Ferraz, H Rodrigues, A Roca-Feltrer, K Baker.  
1561 Community health worker knowledge, attitudes and practices towards COVID-  
1562 19: Learnings from an online cross-sectional survey using a digital health  
1563 platform, UpSCALE, in Mozambique. PloS one. 2021;16(2):e0244924.
- 1564 287. LX He, HF Ren, FJ Chen, ZL Chen, C Wang, RX Zhang, Y Jiang.  
1565 Perspectives of nursing directors on emergency nurse deployment during the  
1566 pandemic of COVID-19: A nationwide cross-sectional survey in mainland China.  
1567 Journal of nursing management. 2022;30(5):1147-56.
- 1568 288. L Shahrin, I Parvin, M Sarmin, NA Abbassi, MM Ackhter, T Alam, GMS  
1569 Mamun, A Rahman, SN Shaima, SS Shikha, DH Jeorge, MA Nahar,  
1570 Sharifuzzaman, H Saha, ASMMH Rahman, ASMSB Shahid, ASG Faruque, T  
1571 Ahmed, MJ Chisti. In-person training on COVID-19 case management and  
1572 infection prevention and control: Evaluation of healthcare professionals in  
1573 Bangladesh. PloS one. 2022;17(10):e0273809.
- 1574 289. JK Joseph, J Rigodon, C Cancedda, M Haidar, N Lesia, L Ramanagoela,  
1575 J Furin. Lay health workers and HIV care in rural Lesotho: a report from the  
1576 field. AIDS patient care and STDs. 2012;26(3):141-7.

- 1577 290. E Setiawan, B Sugeng, A Luailiyah, FR Makarim, S Trisnadi. Evaluating  
1578 knowledge and skill in surgery clerkship during covid 19 pandemics: A single-  
1579 center experience in Indonesia. *Annals of medicine and surgery* (2012).  
1580 2021;68:102685.
- 1581 291. B Furkan Dağcioğlu, A Baydar Artantaş, A Keskin, İ Karataş Eray, Y  
1582 Üstü, M Uğurlu. Social adaptation status of Syrian refugee physicians living in  
1583 Turkey. *Central European journal of public health*. 2020;28(2):149-54.
- 1584 292. A Leichner, A Akhtar, C Nic A Bhaird, R Wener, SM Perera, I  
1585 Weissbecker. Mental health integration in primary health services after the  
1586 earthquake in Nepal: a mixed-methods program evaluation. *Global mental*  
1587 *health* (Cambridge, England). 2021;8:e10.
- 1588 293. H. Kabir, T.T. Tonmon, Md.K. Hasan, L. Biswas, Md.A.H. Chowdhury,  
1589 M.D. Islam, M. Rahman, Mitra D.K. AO - Kabir Humayun, ORCID:  
1590 <https://orcid.org/---> AO - Tonmon Tajrin Tahrin, ORCID: <https://orcid.org/---679X>  
1591 AO - Mitra Dipak Kumar, ORCID: <https://orcid.org/---> AO - Rahman Mamunur,  
1592 ORCID: <https://orcid.org/---> AO - Hasan Md. Kamrul, <https://orcid.org/--->  
1593 ORCID:. Association between preference and e-learning readiness among the  
1594 Bangladeshi female nursing students in the COVID-19 pandemic: a cross-  
1595 sectional study. *medRxiv*. 2021.
- 1596 294. SS Siddiqui, S Saxena, S Agrawal, A Lohiya, SN Muzaffar, S Saran, S  
1597 Misra, N Rai, A Agrawal. The impact of a "short-term" basic intensive care  
1598 training program on the knowledge of nonintensivist doctors during the COVID-  
1599 19 pandemic: An experience from a population-dense low- and middle-income  
1600 country. *Australian critical care : official journal of the Confederation of*  
1601 *Australian Critical Care Nurses*. 2023;36(1):138-44.

1602 295. R Cianelli, C Wilkinson, E Mitchell, D Anglade, G Nicolas, V Mitrani, N  
1603 Peragallo. Mental health training experiences among Haitian healthcare  
1604 workers post-earthquake 2010. *International nursing review*. 2013;60(4):528-35.

1605 296. PM Davidson, CJ Lin, A Beaman, D Jackson, NR Reynolds, WV Padula.  
1606 Global digital social learning as a strategy to promote engagement in the era of  
1607 COVID-19. *Journal of clinical nursing*. 2021;30(15):2366-72.

1608 297. O Barbier, M Racle. Has Current French Training for Military Orthopedic  
1609 Surgeons Deployed in External Operations Been Appropriately Adapted?  
1610 *Military medicine*. 2018;183(9):e411-e5.

1611 298. M Saghafinia, N Nafissi, R Asadollahi. Effect of the rural rescue system  
1612 on reducing the mortality rate of landmine victims: a prospective study in Ilam  
1613 Province, Iran. *Prehospital and disaster medicine*. 2009;24(2):126-9.

1614 299. J Kesavadev, A Basanth, G Krishnan, R Vitale, H Parameswaran, S  
1615 Shijin, S R, S Raj, A Ashik, A Shankar, S Badarudeen, AV Raveendran, I  
1616 Rajalakshmy, G Sanal, A Manoj, R Jose, Y Unes, S Jothydev. A new  
1617 interventional home care model for COVID management: Virtual Covid IP.  
1618 *Diabetes & metabolic syndrome*. 2021;15(5):102228.

1619 300. HX Bai, R Wang, Z Xiong, B Hsieh, K Chang, K Halsey, TML Tran, JW  
1620 Choi, DC Wang, LB Shi, J Mei, XL Jiang, I Pan, QH Zeng, PF Hu, YH Li, FX Fu,  
1621 RY Huang, R Sebro, QZ Yu, et al. Artificial Intelligence Augmentation of  
1622 Radiologist Performance in Distinguishing COVID-19 from Pneumonia of Other  
1623 Origin at Chest CT. *Radiology*. 2020;296(3):E156-E65.

1624 301. A Das, R Garg, ES Kumar, D Singh, B Ojha, HL Kharchandy, BK Pathak,  
1625 P Srikrishnan, R Singh, I Joshua, S Nandekar, V J, R Reghu, N Pedapanga, T  
1626 Banerjee, KK Yadav. Implementation of infection prevention and control

- practices in an upcoming COVID-19 hospital in India: An opportunity not missed. PloS one. 2022;17(5):e0268071.
302. M. Keita, A.Y. Camara, F. Traore, M.E. Camara, A. Kpanamou, S. Camara, A. Tolno, B. Houndjo, F. Diallo, F. Conte, Subissi L. AO - Keita Mory, <https://orcid.org/---> ORCID:. Impact of infection prevention and control training on health facilities during the Ebola virus disease outbreak in Guinea. BMC public health. 2018;18(1):547.
303. M. Manoel Fernandes Canesin, F. Furtado, R. Goncalves, A. Barretto, M. Oliveira, B. Pisani, R. Baptista, B. Moura. Use of an innovative humanized virtual digital interactive heart failure clinical cases training strategy for cardiologist in the covid 19 pandemic. European Journal of Heart Failure. 2022;24:261-2.
304. J. Toro, J.S. Rivera, D. Rodriguez, L.A. Serna, J. Gaitan, T. Medina, F. Cortes-Munoz, M. Yepes. A Simulated Hospital in a COVID-19 Pandemic Environment for Undergraduate Neurology Students. Neurology. 2022;98(18).
305. V. Kumar, C. Bailry, S. Manchegowda, C. Dickerson, M. Arthur. Effectiveness of virtual versus inperson training of the FCCS course: A comparative study. Critical Care Medicine. 2022;50(1):525.
306. S Ray, R Mash. Innovation in primary health care responses to COVID-19 in Sub-Saharan Africa. Primary health care research & development. 2021;22:e44.
307. O Olu, A Usman, K Kalambay, S Anyangwe, K Voyi, CG Orach, A Azazh, MA Mapatano, N Nsenga, L Manga, S Woldetsadik, F Nguessan, A Benson. What should the African health workforce know about disasters? Proposed

1651 competencies for strengthening public health disaster risk management  
1652 education in Africa. BMC medical education. 2018;18(1):60.

1653 308. O Dunin-Bell. What do They Know? Guidelines and Knowledge  
1654 Translation for Foreign Health Sector Workers Following Natural Disasters.  
1655 Prehospital and disaster medicine. 2018;33(2):139-46.

1656 309. N Shilkofski, M Agueh, M Fonseka, A Tan, JR Cembrano. Pediatric  
1657 Emergency Care in Disaster-Affected Areas: A Firsthand Perspective after  
1658 Typhoons Bopha and Haiyan in the Philippines. Journal of pediatric intensive  
1659 care. 2017;6(1):19-27.

1660 310. KKC Hung, S Mashino, EYY Chan, MK MacDermot, S Balsari, GR  
1661 Ciottone, F Della Corte, MF Dell'Arima, S Egawa, BD Evio, A Hart, H Hu, T  
1662 Ishii, L Ragazzoni, H Sasaki, JH Walline, CS Wong, HK Bhattarai, S Dalal, R  
1663 Kayano, et al. Health Workforce Development in Health Emergency and  
1664 Disaster Risk Management: The Need for Evidence-Based Recommendations.  
1665 International journal of environmental research and public health. 2021;18(7).

1666 311. F Jaguga, E Kwobah. Mental health response to the COVID-19  
1667 pandemic in Kenya: a review. International journal of mental health systems.  
1668 2020;14:68.

1669 312. AJ Cuen, A Kante, S Tsemo, B Djoudalbaye. Fighting COVID-19 and  
1670 HIV through community mobilisation: lessons from an integrated approach to  
1671 the Africa CDC Partnership to Accelerate COVID-19 Testing (PACT) initiative in  
1672 seven countries. African journal of AIDS research : AJAR. 2022;21(2):132-42.

1673 313. Z Ren, H Wang, W Zhang. Experiences in disaster-related mental health  
1674 relief work: An exploratory model for the interprofessional training of

- 1675 psychological relief workers. Journal of interprofessional care. 2017;31(1):35-  
1676 42.
- 1677 314. Skinner N. A., Job N., Krause J., Frankel A., Ward V., Johnston J. S. The  
1678 Use of Open-Source Online Course Content for Training in Public Health  
1679 Emergencies: Mixed Methods Case Study of a COVID-19 Course Series for  
1680 Health Professionals. JMIR Med Educ. 2023;9:e42412.
- 1681 315. LA Camputaro, ME Bello Quezada, WA Hoyos Arango, RG Bortoli, FA  
1682 Ruiz Zelaya, MM Diaz Moreno, JM Delgado Delgado, MS Márquez Magaña, PA  
1683 Vigne Cuellar, MI Sanchez. Intensive competency-based training strategy in a  
1684 National Hospital in times of Pandemic. Medicine. 2021;100(39):e27152.
- 1685 316. K Fredricks, H Dinh, M Kusi, C Yogal, BM Karmacharya, TF Burke, BD  
1686 Nelson. Community Health Workers and Disasters: Lessons Learned from the  
1687 2015 Earthquake in Nepal. Prehospital and disaster medicine. 2017;32(6):604-  
1688 9.
- 1689 317. G Gunnlaugsson, ÍE Hauksdóttir, IC Bygbjerg, B Pinkowski Tersbøl. 'Tiny  
1690 Iceland' preparing for Ebola in a globalized world. Global health action.  
1691 2019;12(1):1597451.
- 1692 318. LM Najarian. Disaster intervention: long-term psychosocial benefits in  
1693 Armenia. Prehospital and disaster medicine. 2004;19(1):79-85.
- 1694 319. H Lopes, V McKay. Adult learning and education as a tool to contain  
1695 pandemics: The COVID-19 experience. International review of education  
1696 Internationale Zeitschrift fur Erziehungswissenschaft Revue internationale de  
1697 pedagogie. 2020;66(4):575-602.
- 1698 320. E Mutabaruka, M Sawadogo, Z Tarnagda, L Ouédraogo, L Sangare, B  
1699 Ousmane, Y Ndjakani, O Namusisi, D Mukanga, M Evering-Watley, S Hounton,

1700 P Nsubuga. The West Africa Field Epidemiology and Laboratory Training  
1701 Program, a strategy to improve disease surveillance and epidemic control in  
1702 West Africa. The Pan African medical journal. 2011;10:10.

1703 321. J.N. Githuku, W.G. Boru, C.D. Hall, Z. Gura, E. Oyugi, R.S. Kishimba, I.  
1704 Semali, G.N. Farhat, M.M. Park. Cholera outbreak in homa bay county, kenya,  
1705 2015. Pan African Medical Journal. 2017;27:4.

1706 322. J.K. Ordonez Juarez, V.M. Pinto Angulo, J.L. Gomez Goytortua, G.A.  
1707 Carrion Crespo, D.R. Gonzalez, I.I. Infante Montano, A.S. Pacheco. Virtual  
1708 Learning Environment for Surgery Residents in a Third Level Hospital at Mexico  
1709 City, a Teaching Alternative. Surgical Endoscopy. 2022;36(1):S156.

1710 323. R. Umoren, E. Gossett, E. Comaroski, N. Rybas, M. Johnson, J. James.  
1711 From global to local: Virtual environments for global-public health education.  
1712 Annals of Global Health. 2016;82(3):601-2.

1713 324. S.M. Daniel, C. Venkateswaran, J. Jeba, R.K. Iyer, S. Rana, M. Leng.  
1714 Evaluation of the faculty experience in developing and delivering palliative care  
1715 e-resource toolkit for COVID-19 for low and middle income countries (LMICS).  
1716 Palliative Medicine. 2021;35(1):217.

1717 325. Begay M., Kakol M., Sood A., Upson D. Strengthening Digital Health  
1718 Technology Capacity in Navajo Communities to Help Counter the COVID-19  
1719 Pandemic. Ann Am Thorac Soc. 2021;18(7):1109-14.

1720 326. Bernstein H. H., Calabrese T., Corcoran P., Flint L. E., Munoz F. M.,  
1721 Workgroup Covid-Echo, In addition to the authors the Covid-Echo Workgroup  
1722 included Laura Aird M. S., James F. Bale Jr Md Faap, H. Dele Davies Md Ms  
1723 Mhcm Faap, Jessica Leffelman B. S., Shannon Limjuco M. P. H. The Power of



1724 Connections: AAP COVID-19 ECHO Accelerates Responses During a Public  
1725 Health Emergency. J Public Health Manag Pract. 2022;28(1):E1-E8.

1726 327. Hunt R. C., Struminger B. B., Redd J. T., Herrmann J., Jolly B. T., Arora  
1727 S., Armistad A. J., Dezan A. M., Bennett C. A., Krohmer J. R., Brown L. H.  
1728 Virtual Peer-to-Peer Learning to Enhance and Accelerate the Health System  
1729 Response to COVID-19: The HHS ASPR Project ECHO COVID-19 Clinical  
1730 Rounds Initiative. Ann Emerg Med. 2021;78(2):223-8.

1731 328. Hunt R. C., Braunstein S. P., Cuddy Egbert L., Gorbach K. A., Rao M.,  
1732 Pearson J. D., Armistad A. J., Arora S., Bennett C. A., Dezan A. M., Herrmann  
1733 J., Redd J. T., Jolly B. T., Krohmer J. R., Struminger B. B. Facilitating Real-  
1734 Time, Multidirectional Learning for Clinicians in a Low-Evidence Pandemic  
1735 Response. Disaster Med Public Health Prep. 2022;17:e246.

1736 329. Lingum N. R., Sokoloff L. G., Meyer R. M., Gingrich S., Sodums D. J.,  
1737 Santiago A. T., Feldman S., Guy S., Moser A., Shaikh S., Grief C. J., Conn D.  
1738 K. Building Long-Term Care Staff Capacity During COVID-19 Through Just-in-  
1739 Time Learning: Evaluation of a Modified ECHO Model. J Am Med Dir Assoc.  
1740 2021;22(2):238-44 e1.

1741 330. Stephens D., Weiser T., Mera J., Becker T., Essex W., Brown H., Vinson  
1742 E., Woodbury M., Reilley B., Leston J. Adapting a Telehealth Network for  
1743 Emergency COVID-19 Pandemic Response, 2020-2021. Public Health Rep.  
1744 2022;333549221123567.

1745 331. Phillips Patricia Pulliam, Phillips Jack J. The business case for learning:  
1746 Using design thinking to deliver business results and increase the investment in  
1747 talent development. . 2017.

- 1748 332. Salas Eduardo, Milham Laura M., Bowers Clint A. Training evaluation in  
1749 the military: Misconceptions, opportunities, and challenges. Military Psychology.  
1750 2003;15(  
1751 1):3-16.
- 1752 333. Sitzmann Traci, Wang Mo. The survey effect: Does administering  
1753 surveys affect trainees' behavior? Learning and Individual Differences.  
1754 2015;37:1-12.
- 1755 334. Kirwan Cyril. Improving Learning Transfer: A Guide to Getting More Out  
1756 of What You Put Into Your Training. 2009.
- 1757 335. Baldwin Timothy T., Ford J. Kevin, Blume Brian D. The State of Transfer  
1758 of Training Research: Moving Toward More Consumer-Centric Inquiry. 2017.  
1759  
1760  
1761

## Identification of studies via databases and registers

### Identification

Records identified from:  
Pubmed/Medline (n = 2858)  
Embase (n = 3553)

Records removed *before*  
*screening*:  
Duplicate records removed (n =  
1656)

### Screening

Records screened  
(n = 4763)

Records excluded  
(n = 4317)

Reports sought for retrieval  
(n = 446)

Reports not retrieved  
(n = 14)

Reports assessed for eligibility  
(n = 432)

Reports excluded:  
Not relevant (n = 113)

### Included

Studies included in review  
(n = 319)

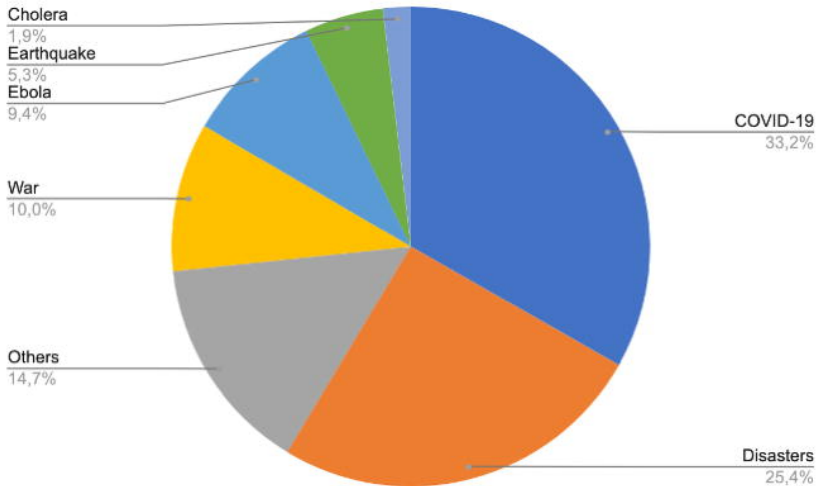

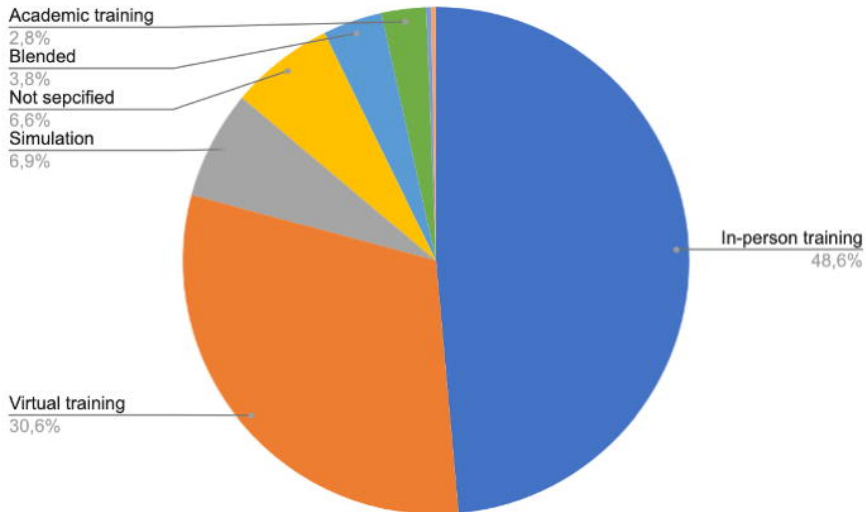

**Impact**

20,7%

**Learning technique**

21,3%

**Knowledge evaluation**

31,7%

**Emergency plans**

26,3%

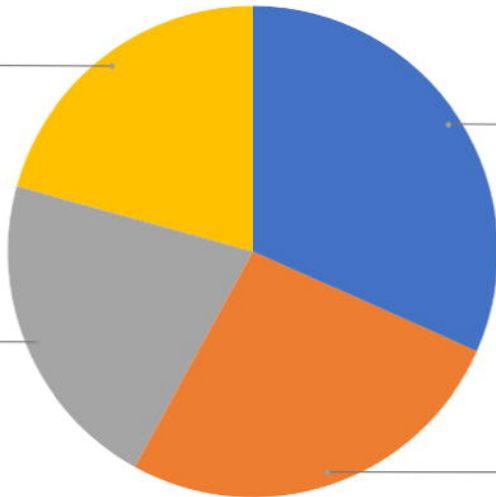

Source: https://www.medrxiv.org/content/medrxiv/early/2023/08/21/2023.08.08.23293718.full.pdf
